# Supplementary material for: Preparation of a national reference material organochlorine pesticide mixture for residue analysis
Source: Royal Society of Chemistry journal article supplement (doi:10.1039/d5ay00190k), 2025-01-01
Supplement: d5ay00190k1.pdf [file d5ay00190k1.pdf]

# Preparation of a National Reference Material Organochlorine Pesticide Mixture for Residue Analysis

Hatice Kılınç<sup>1</sup>, Serpil Yenisoğlu<sup>1\*</sup>

<sup>1</sup>Bolu Abant İzzet Baysal University, Faculty of Arts and Science, Department of Chemistry, 14030, Gölköy, Bolu,  
Türkiye

\*Corresponding author

\*email:serpilyenisoy@ibu.edu.tr

**Table S1.** Some technical information of reference materials

| No | Name of Compound | CAS | Product Code | Using |
|----|------------------|-----|--------------|-------|
|----|------------------|-----|--------------|-------|

|    |                                                                           | No         |               | Solvent |
|----|---------------------------------------------------------------------------|------------|---------------|---------|
| 1  | 4,4'-DDT                                                                  | 50-29-3    | DRE-C12082000 | AL      |
| 2  | 2,4'-DDT                                                                  | 789-02-6   | N-12708-50MG  | AL      |
| 3  | 4,4'-DDD (4,4-TDE)                                                        | 72-54-8    | N-10874-250MG | AL      |
| 4  | Aldrin (HHDN)                                                             | 309-00-2   | N-11049-250MG | AL      |
| 5  | Dieldrin                                                                  | 60-57-1    | N-11688-100MG | AL      |
| 6  | <i>alpha</i> -endosulfan                                                  | 959-98-8   | N-10979-100MG | AL      |
| 7  | <i>beta</i> -endosulfan                                                   | 33213-65-9 | DRE-C13122000 | AL      |
| 8  | Endrin                                                                    | 72-20-8    | N-11854-100MG | AL      |
| 9  | <i>alpha</i> -HCH (Alpha BHC)                                             | 319-84-6   | N-11194-100MG | AL      |
| 10 | <i>gamma</i> -HCH (Lindane, Gamma BHC)                                    | 58-89-9    | DRE-C14073000 | AL      |
| 11 | Heptachlor                                                                | 76-44-8    | N-12147-100MG | AL      |
| 12 | Heptachlor- <i>endo</i> -epoxide (Isomer A)<br>(Trans-Heptachloroepoxide) | 28044-83-9 | N-13618-50MG  | ME      |

**Table S2.** The concentration of individual solutions

---

| <b>Name</b>                                                  | <b>GRAVIMETRIC (Mix A and B)</b> | <b>VOLUMETRIC (Mix C)</b>  |
|--------------------------------------------------------------|----------------------------------|----------------------------|
|                                                              | <b>Concentration (ppm)</b>       | <b>Concentration (ppm)</b> |
| HCH-alpha (Alpha BHC)                                        | 17682                            | 14148                      |
| HCH-gamma (Lindane, Gamma BHC)                               | 10880                            | 8646                       |
| Aldrin                                                       | 11858                            | 9320                       |
| Dieldrin                                                     | 17682                            | 14148                      |
| Endrin                                                       | 14778                            | 11790                      |
| 4,4-DDD (4,4-TDE)                                            | 9411                             | 7467                       |
| 4,4-DDT                                                      | 17682                            | 14148                      |
| 2,4-DDT                                                      | 12833                            | 10218                      |
| Endosulfan-alpha                                             | 19608                            | 15720                      |
| Endosulfan-beta                                              | 16716                            | 13362                      |
| Heptachlor                                                   | 17682                            | 14148                      |
| Heptachlor Endoepoxide (Isomer A) (Trans-Heptachloroepoxide) | 17682                            | -                          |

---

**Table S3.** Operation Parameters of Gas Chromatography – Mass Spectrometry

| GC                               |             |                   |    |       |                 |         |         |           |         |
|----------------------------------|-------------|-------------------|----|-------|-----------------|---------|---------|-----------|---------|
| Program: Column Oven Temperature |             |                   |    |       |                 | Column: |         |           |         |
|                                  |             | Final Temperature |    |       |                 |         |         |           |         |
| Column Oven Temperature          | 70°C        | Rate              |    | (°C)  | Hold Time (min) | Name    | HP 5 MS | Thickness | 0.25 µm |
| Injection Temperature            | 240°C       | 0                 | -  | 70.0  | 2               | Length  | 30 m    | Diameter  | 0.25 mm |
| Injection Mode                   | Splitless   | 1                 | 15 | 160.0 | 0               |         |         |           |         |
| Sampling Time                    | 1.00 min    | 2                 | 2  | 200.0 | 0               |         |         |           |         |
| Carrier Gas                      | Helium      | 3                 | 10 | 250.0 | 0               |         |         |           |         |
|                                  | Linear      |                   |    |       |                 |         |         |           |         |
| Flow Control Mode                | Velocity    | 4                 | 20 | 280.0 | 4               |         |         |           |         |
| Column Flow                      | 1.00 mL/min |                   |    |       |                 |         |         |           |         |
| Linear Velocity                  | 36.7 cm/sec |                   |    |       |                 |         |         |           |         |
| Purge Flow                       | 3.0 mL/min  |                   |    |       |                 |         |         |           |         |
| MS                               |             |                   |    |       |                 |         |         |           |         |
| Ion Source Temperature           | 230°C       |                   |    |       |                 |         |         |           |         |
| Interface Temperature            | 280°C       |                   |    |       |                 |         |         |           |         |
| Solvent Cut Time                 | 6 min       |                   |    |       |                 |         |         |           |         |

**Table S4.** The results of ANOVA

| Name                             | F    | F <sub>criteria</sub> |
|----------------------------------|------|-----------------------|
| <i>alpha</i> -HCH                | 4.29 | 5.32                  |
| <i>gamma</i> -HCH                | 0.18 | 5.32                  |
| Aldrin                           | 0.46 | 5.32                  |
| Dieldrin                         | 0.96 | 5.32                  |
| Endrin                           | 0.20 | 5.32                  |
| 4,4'-DDD                         | 0.16 | 5.32                  |
| 4,4'-DDT                         | 0.81 | 5.32                  |
| 2,4'-DDT                         | 0.76 | 5.32                  |
| <i>alpha</i> -endosulfan         | 2.84 | 5.32                  |
| <i>beta</i> -endosulfan          | 0.93 | 5.32                  |
| Heptachlor                       | 0.08 | 5.32                  |
| Heptachlor- <i>endo</i> -epoxide | 2.01 | 5.32                  |

**Table S5.** The results of homogeneity testing for mix A by gravimetrically

| Name                             | SS <sub>within</sub> | SS <sub>between</sub> | MS <sub>within</sub> | MS <sub>between</sub> | u <sub>bb</sub> | S <sub>bb</sub> |
|----------------------------------|----------------------|-----------------------|----------------------|-----------------------|-----------------|-----------------|
| <i>alpha</i> -HCH                | 0.005                | 0.003                 | 0.001                | 0.003                 | 0.009           | 0.02            |
| <i>gamma</i> -HCH                | 0.004                | 0.000                 | 0.001                | 0.000                 | 0.009           | -               |
| Aldrin                           | 0.005                | 0.000                 | 0.001                | 0.000                 | 0.009           | -               |
| Dieldrin                         | 0.007                | 0.001                 | 0.001                | 0.001                 | 0.011           | -               |
| Endrin                           | 0.007                | 0.000                 | 0.001                | 0.000                 | 0.011           | -               |
| 4,4'-DDD                         | 0.024                | 0.000                 | 0.003                | 0.000                 | 0.020           | -               |
| 4,4'-DDT                         | 0.032                | 0.003                 | 0.004                | 0.003                 | 0.024           | -               |
| 2,4'-DDT                         | 0.018                | 0.002                 | 0.002                | 0.002                 | 0.018           | -               |
| <i>alpha</i> -endosulfan         | 0.006                | 0.002                 | 0.001                | 0.002                 | 0.010           | 0.02            |
| <i>beta</i> -endosulfan          | 0.005                | 0.001                 | 0.001                | 0.001                 | 0.009           | -               |
| Heptachlor                       | 0.022                | 0.000                 | 0.003                | 0.000                 | 0.020           | -               |
| Heptachlor- <i>endo</i> -epoxide | 0.004                | 0.001                 | 0.000                | 0.001                 | 0.008           | 0.01            |

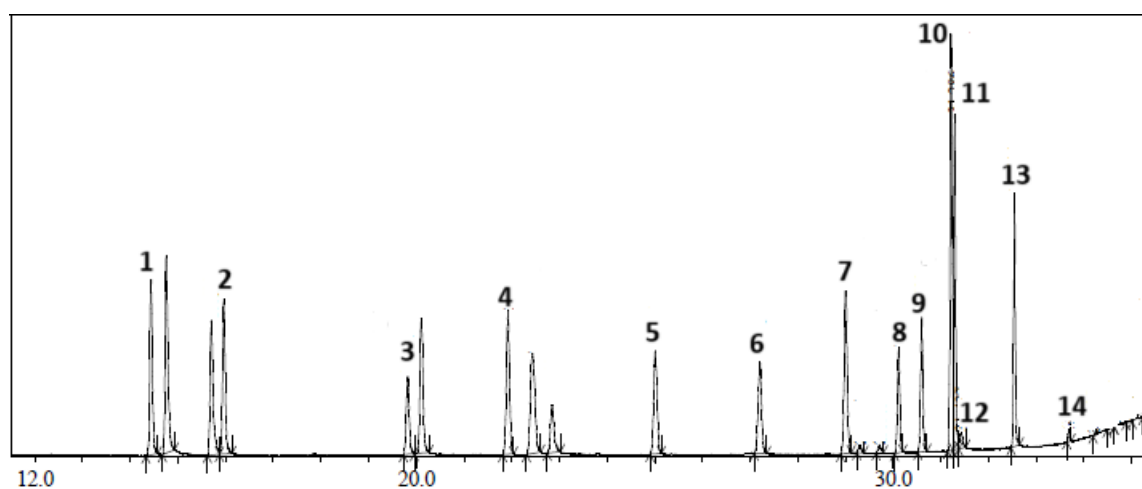

**Fig. S1** The chromatogram of 2 ppm calibration standard (Peak 1: *alpha*-HCH, Peak 2: *gamma*-HCH, Peak 3: heptachlor, Peak 4: aldrin, Peak 5: heptachlor-*endo*-epoxide, Peak 6: *alpha*-endosulfan, Peak 7: dieldrin, Peak 8: endrin, Peak 9: *beta*-endosulfan, Peak 10: 4,4'-DDD, Peak 11: 2,4'-DDT, Peak 12: endrin aldehyde, Peak 13: 4,4'-DDT, Peak 14: endrin ketone)

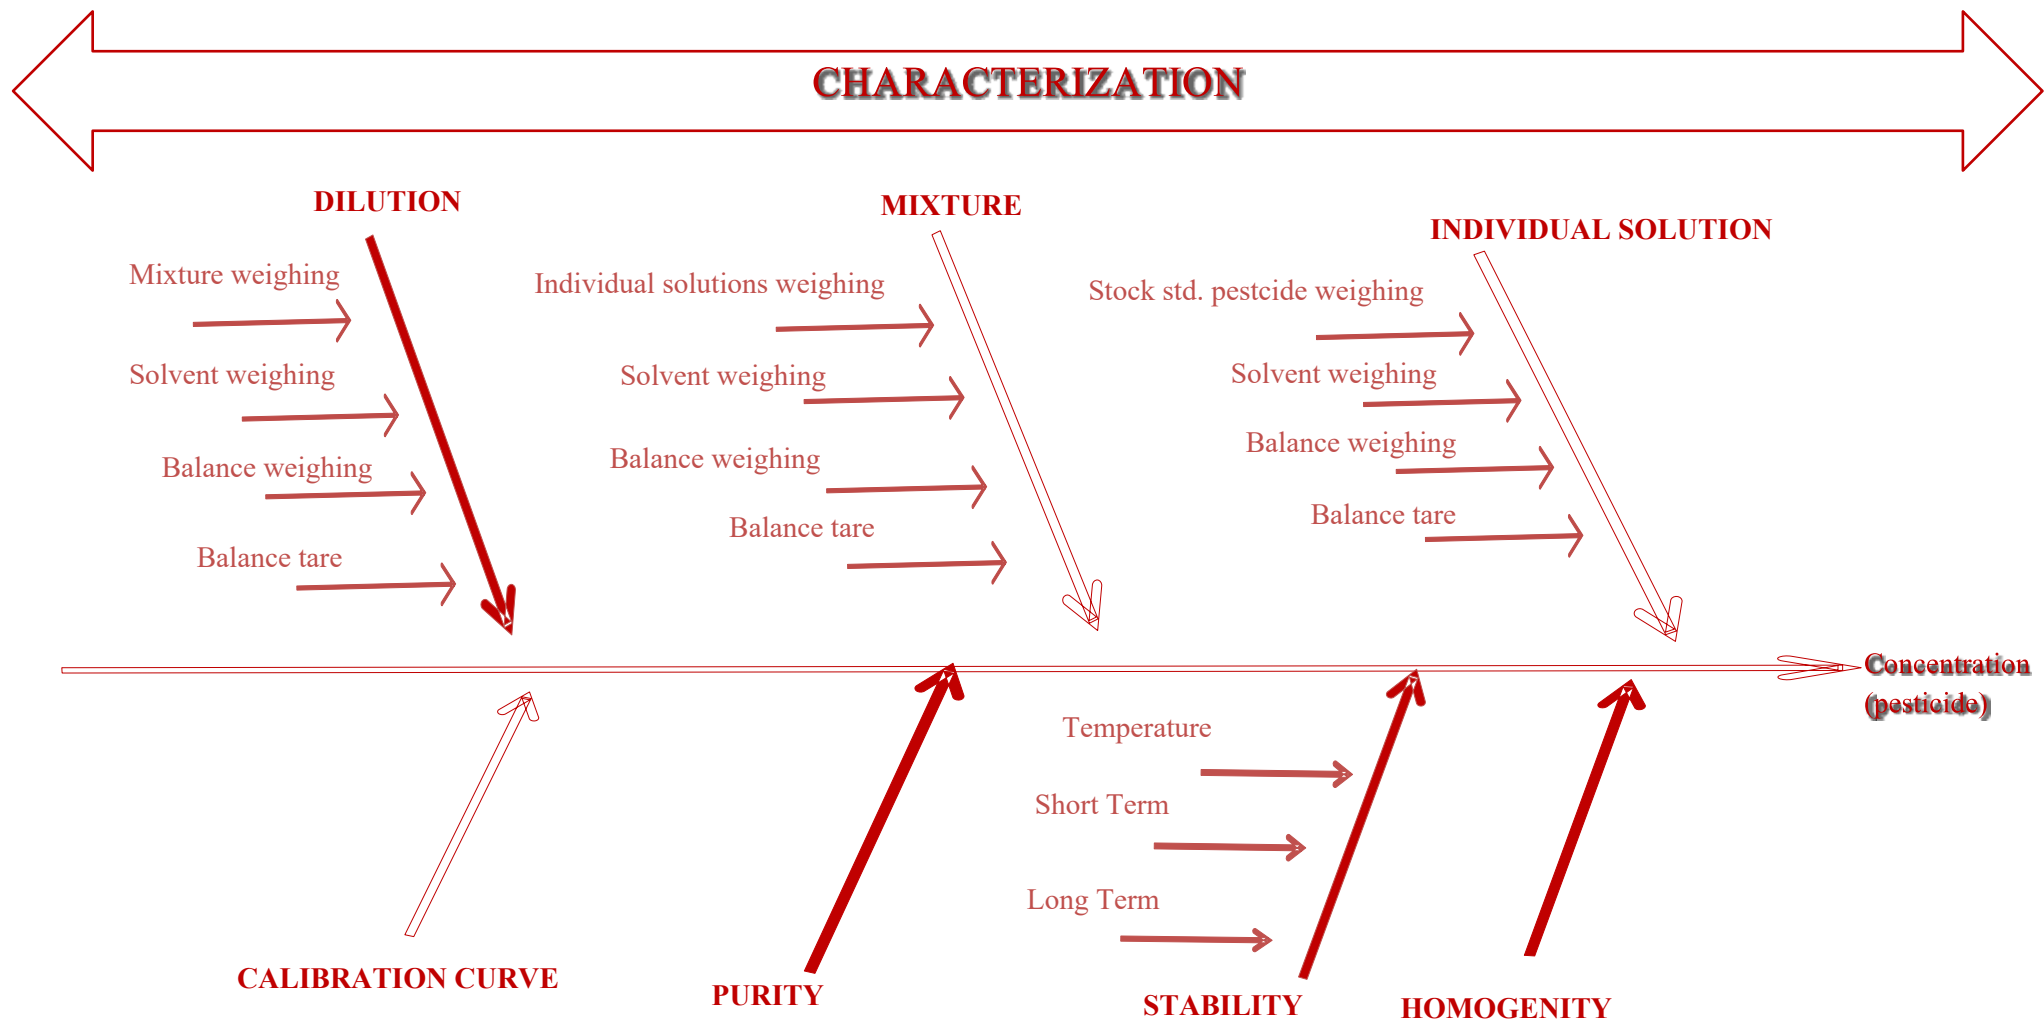

**Fig. S2** Fish bone diagram of preparing CRM gravimetrically

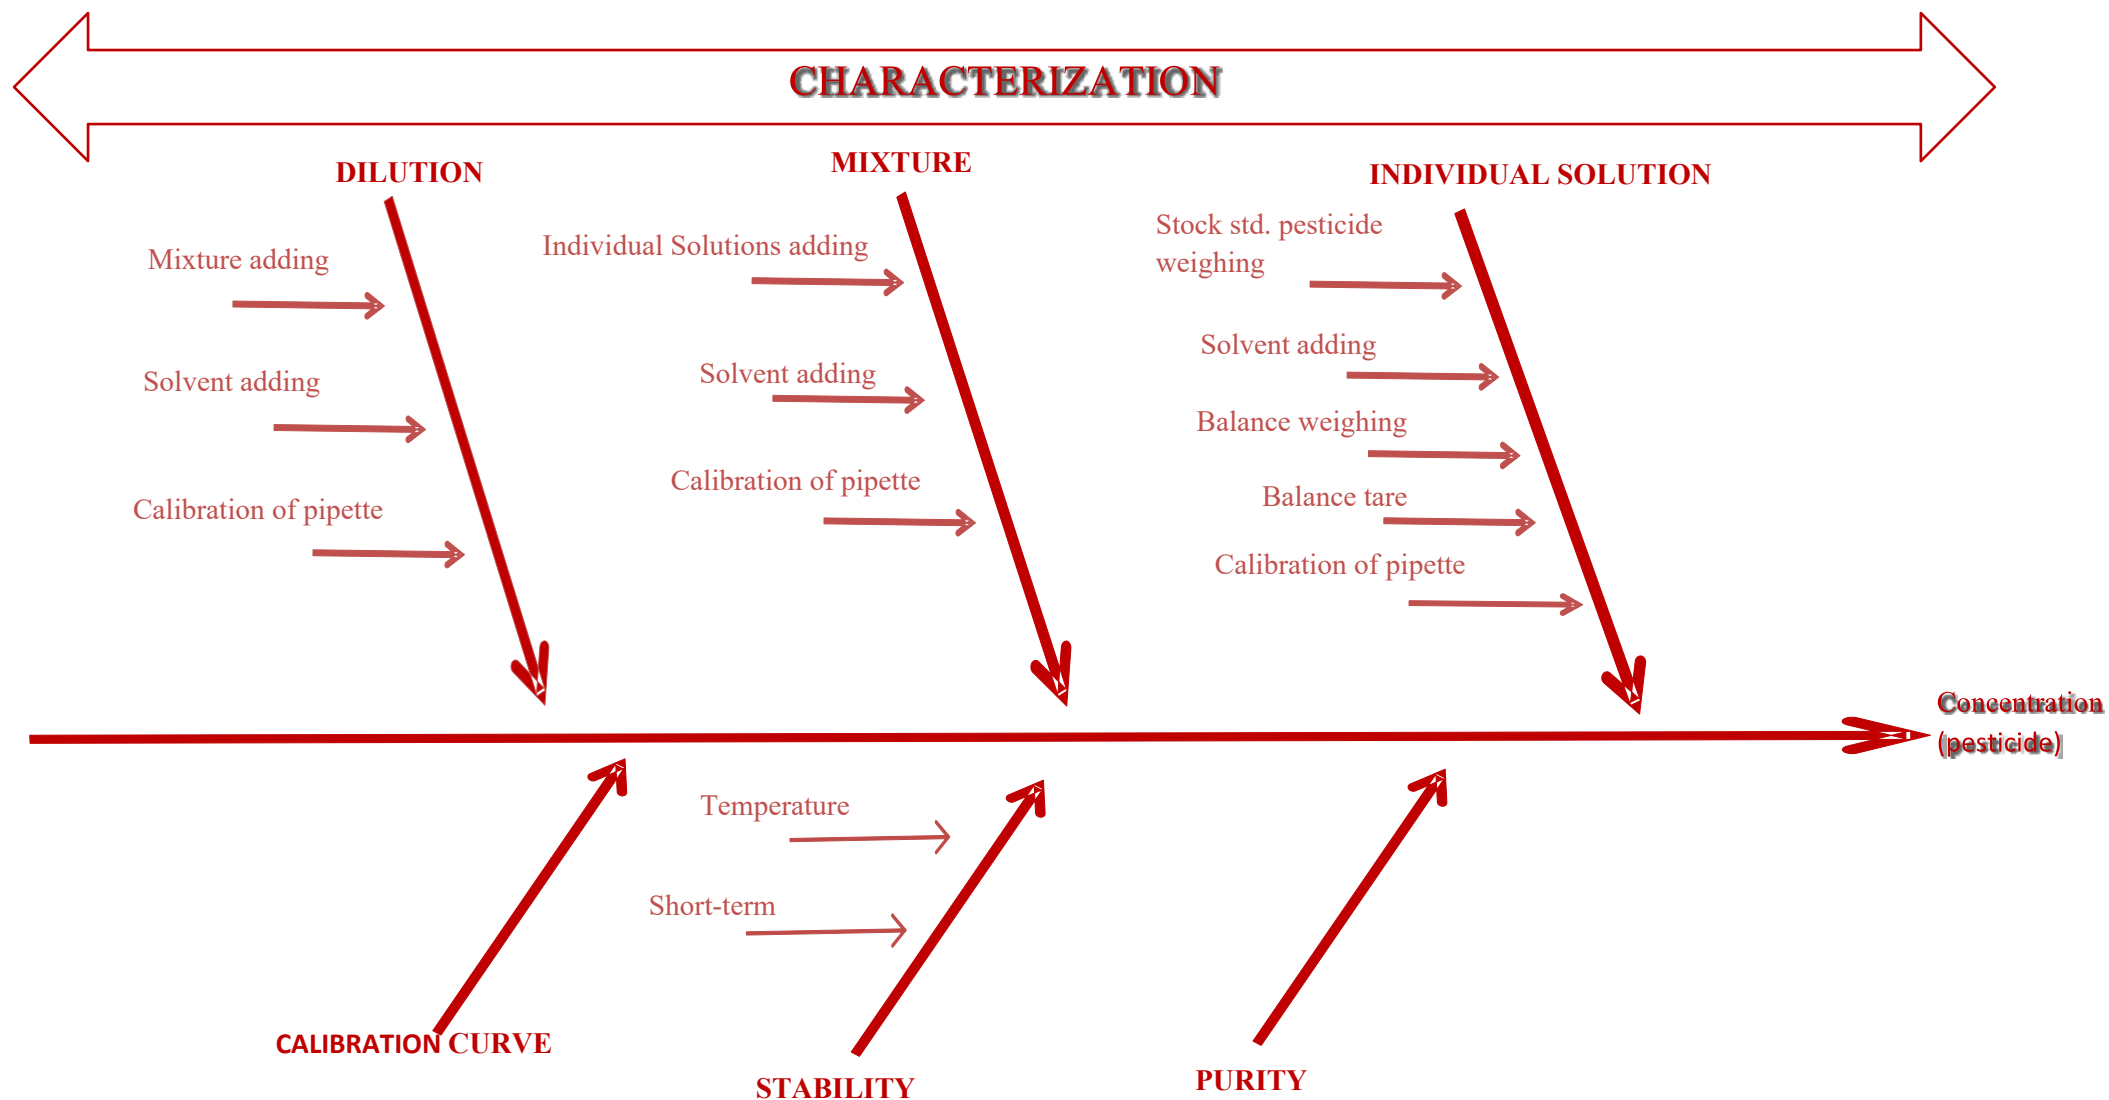

**Fig. S3** Fish bone diagram of preparing CRM volumetrically



Stability of alpha-HCH in mix C  
at -20°C for short-term

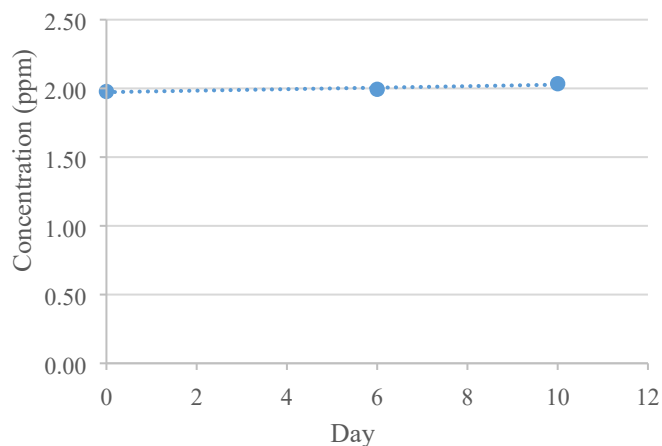

Stability of gamma-HCH in mix C  
at -20°C for short-term

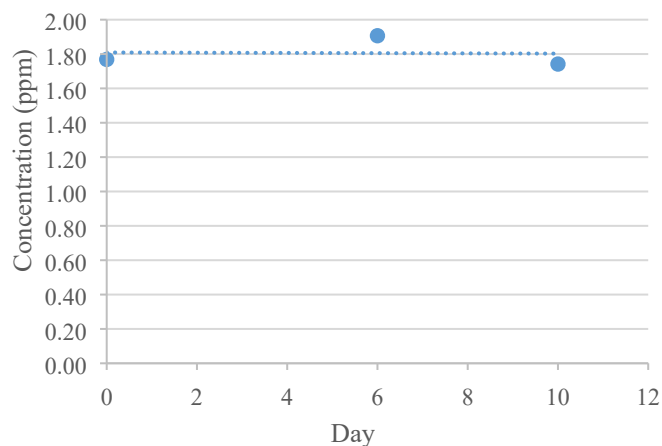

Stability of aldrin in mix C  
at -20°C for short-term

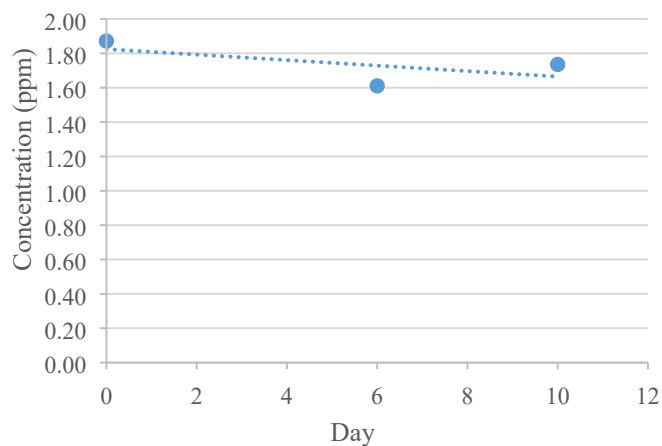

Stability of dieldrin in mix C  
at -20°C for short-term

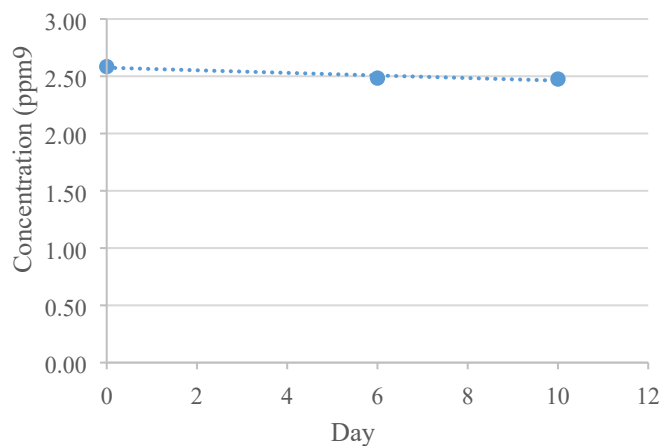

Stability of endrin in mix C at  
-20°C for short-term

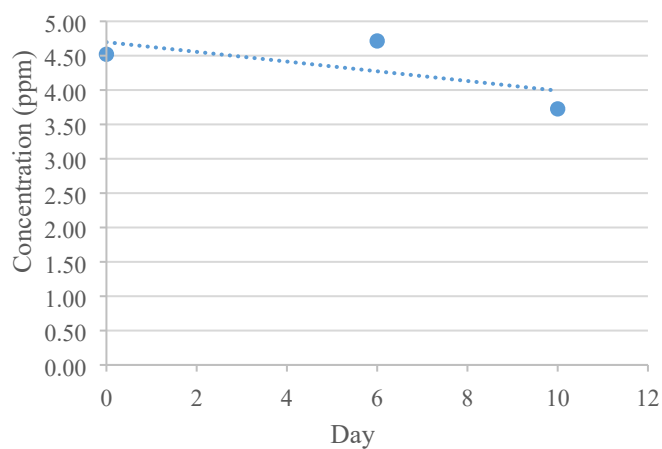

Stability of 4,4'-DDD in mix C  
at -20°C for short-term

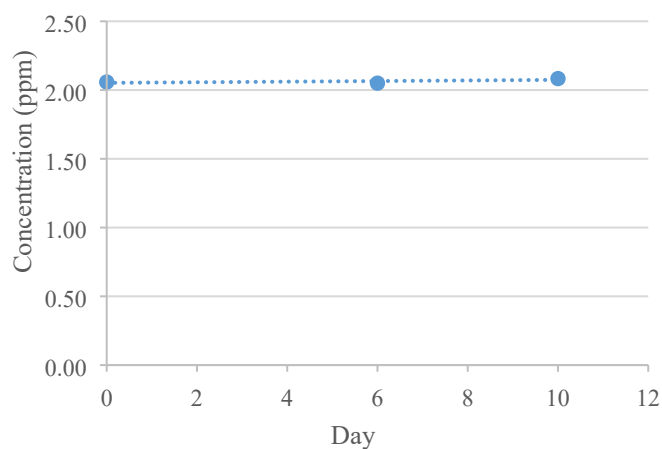

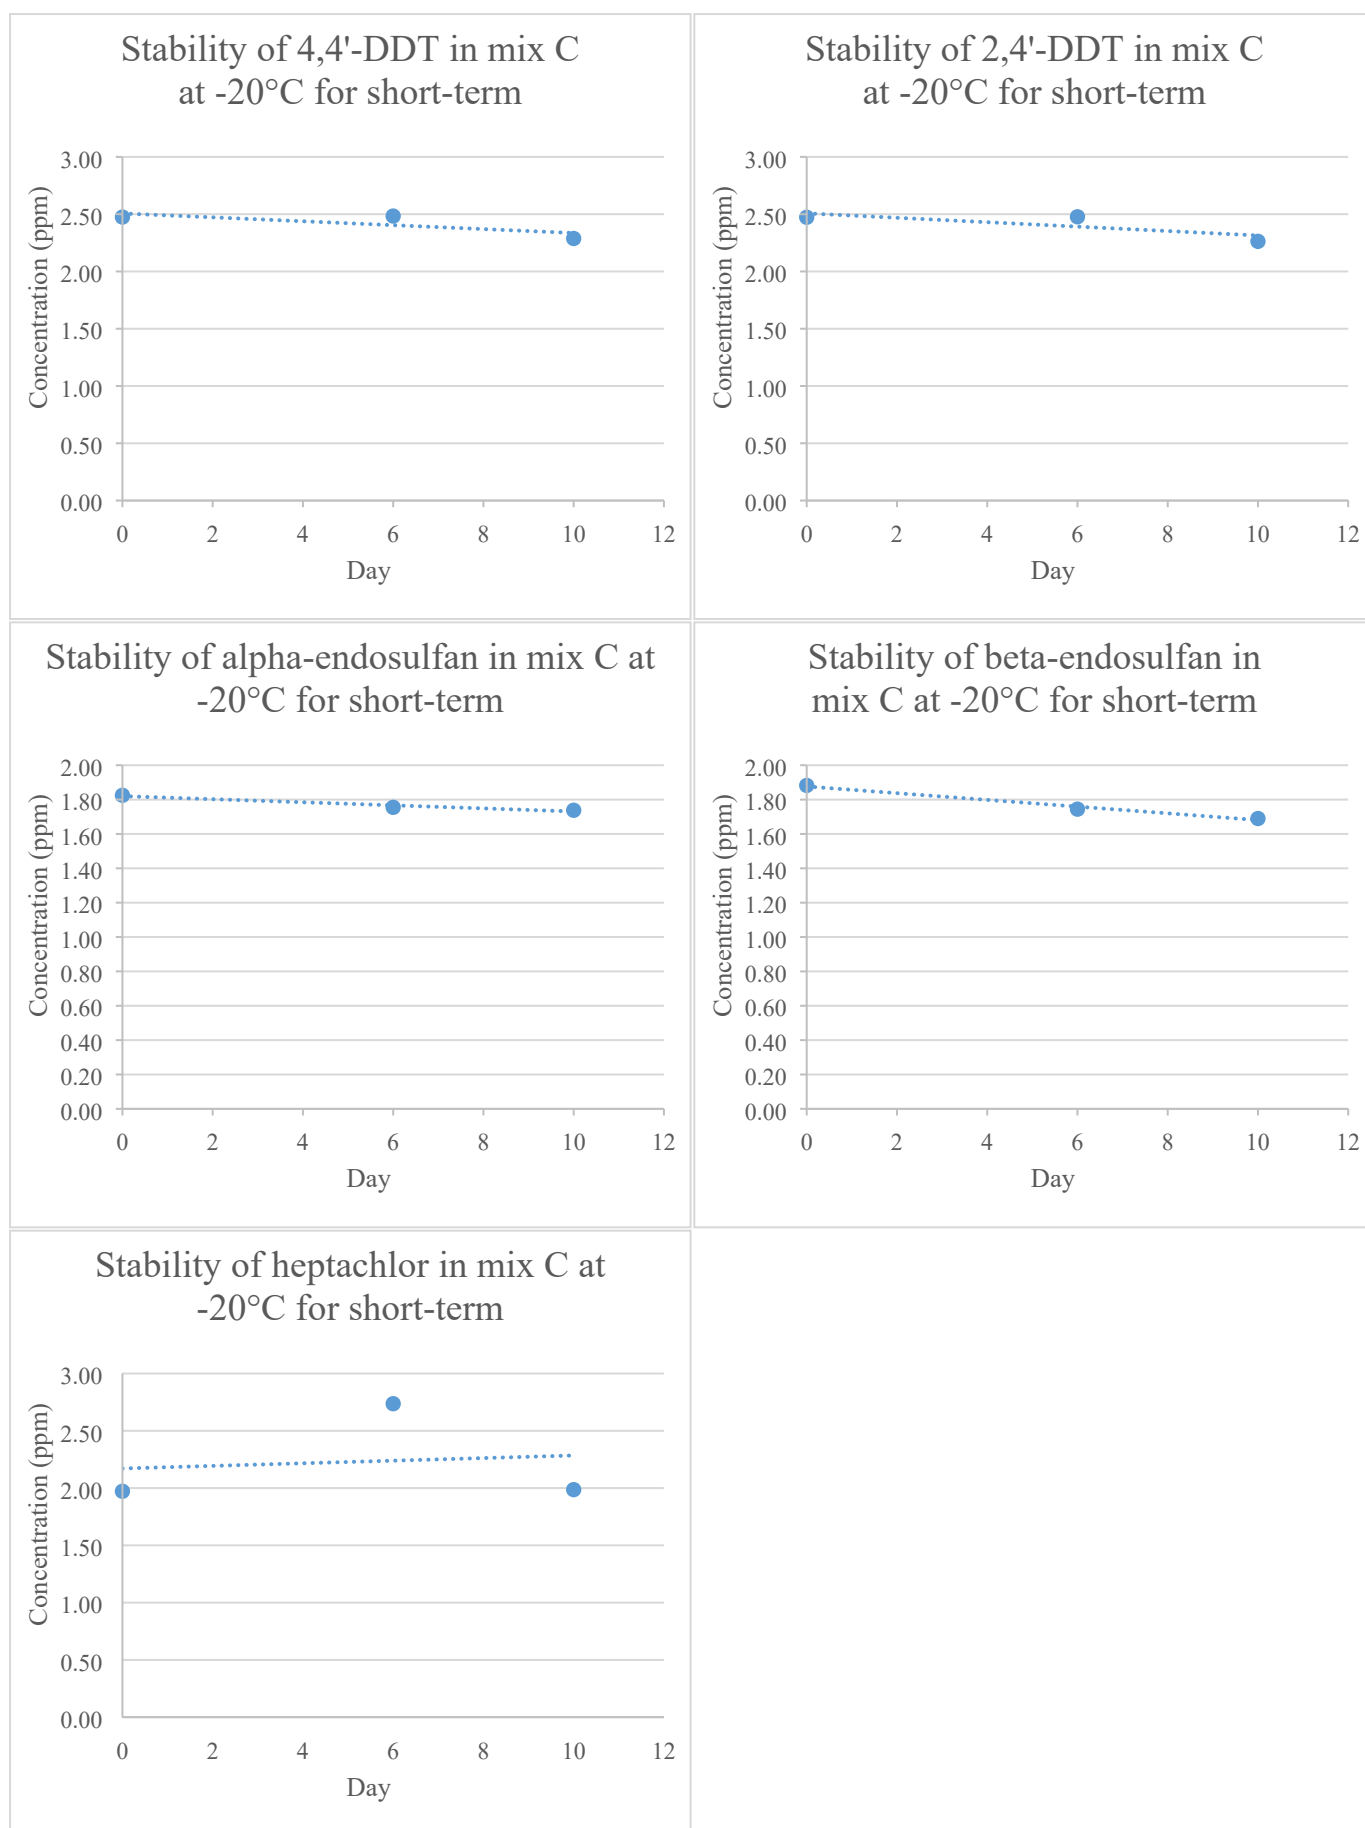

**Fig. S4** The plots of volumetric mix C in short-term stability at -20°C for each pesticide

Stability of alpha-HCH in first bottle of mix A at -20°C for short-term

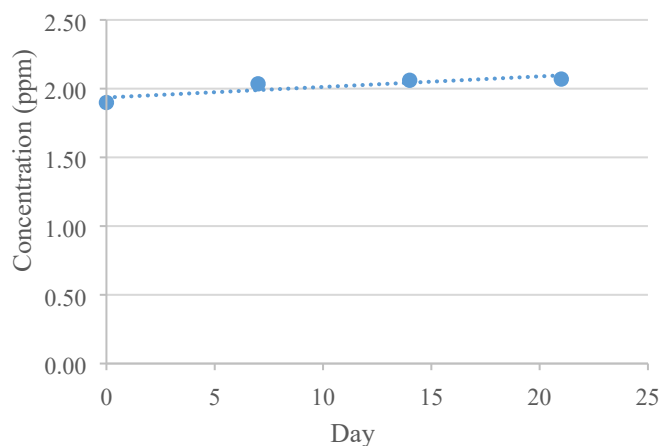

Stability of alpha-HCH in second bottle of mix A at -20°C for short-term

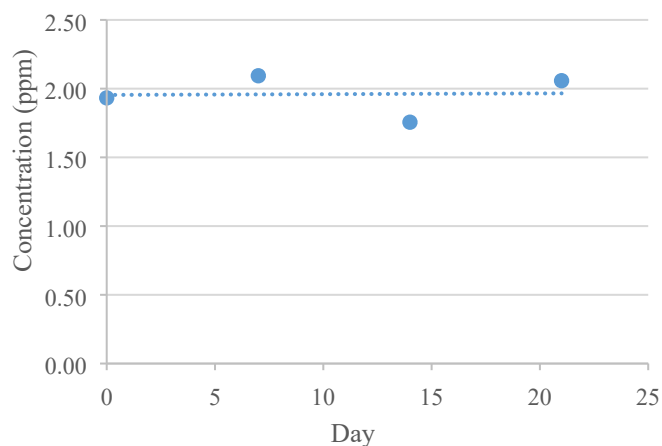

Stability of gamma-HCH in first bottle of mix A at -20°C for short-term

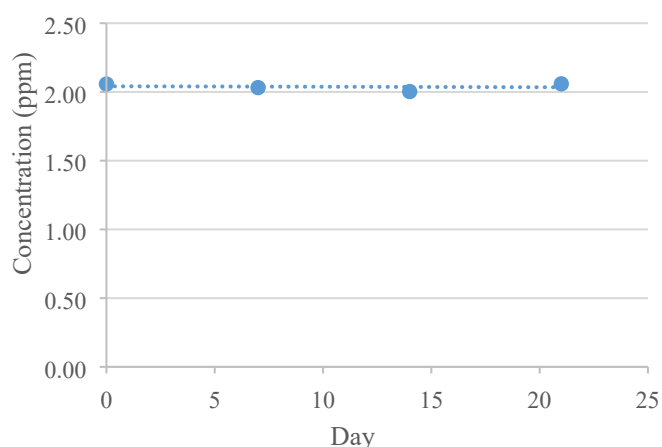

Stability of gamma-HCH in second bottle of mix A at -20°C for short-term

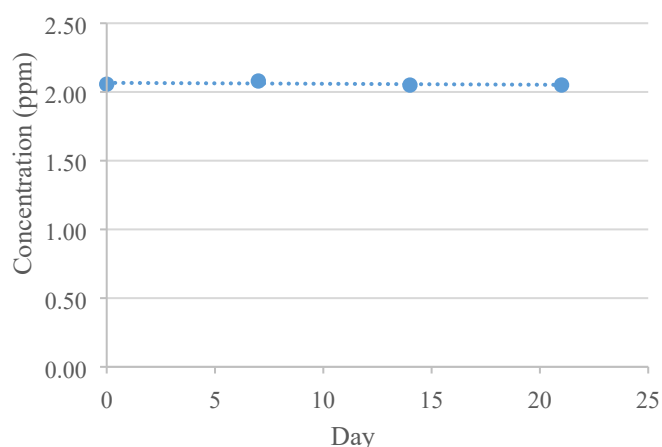

Stability of aldrin in first bottle of mix A at -20°C for short-term

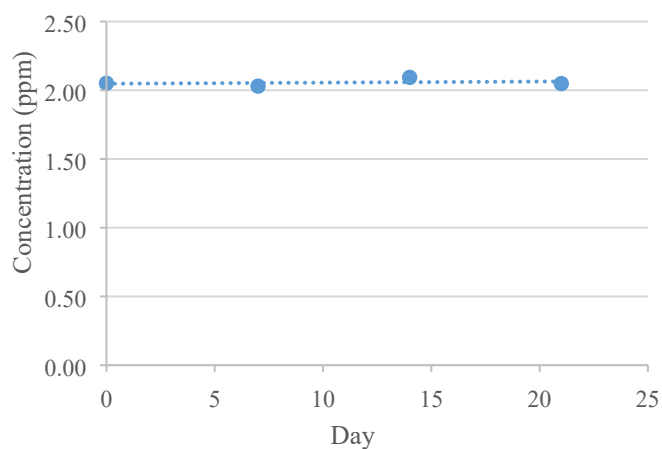

Stability of aldrin in second bottle of mix A at -20°C for short-term

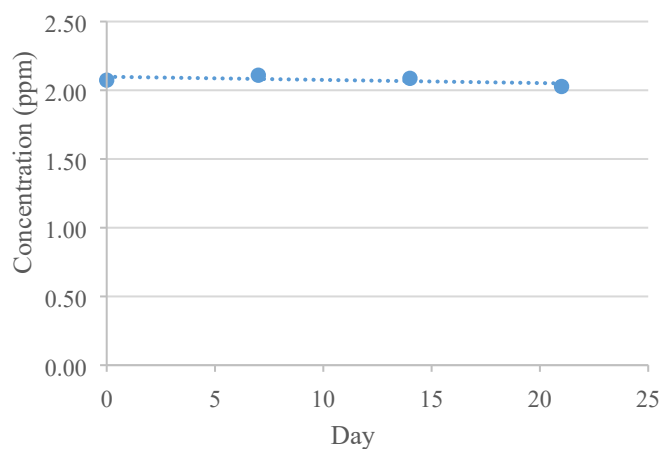

Stability of dieldrin in first bottle of mix A at -20°C for short-term

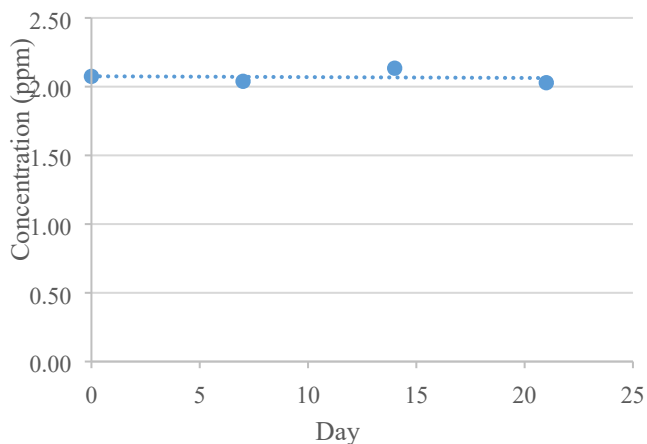

Stability of dieldrin in second bottle of mix A at -20°C for short-term

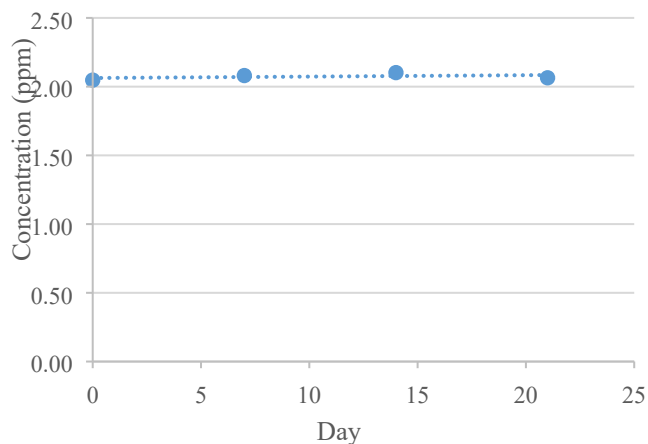

Stability of endrin in first bottle of mix A at -20°C for short-term

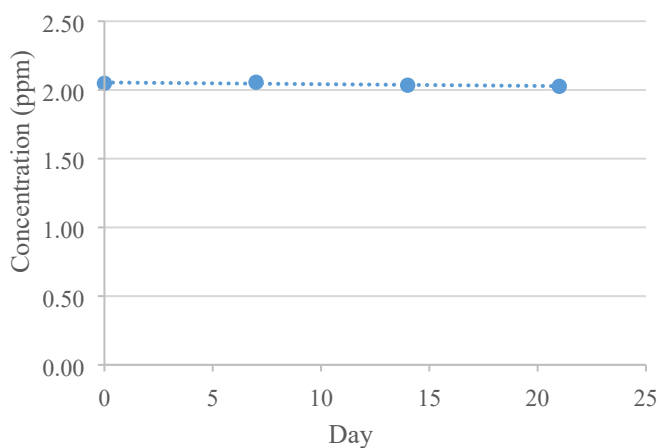

Stability of endrin in second bottle of mix A at -20°C for short-term

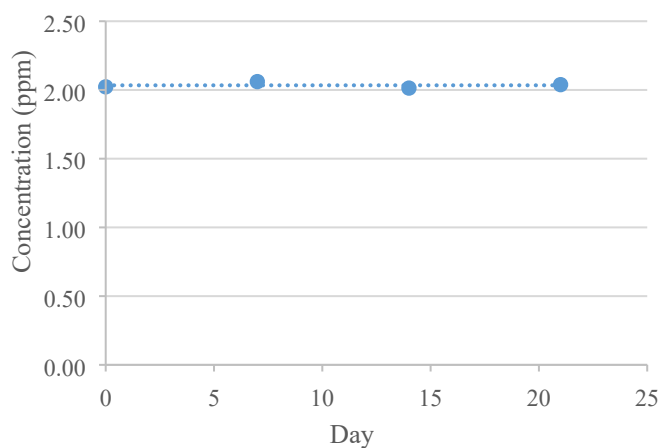

Stability of 4,4'-DDD in first bottle of mix A at -20°C for short-term

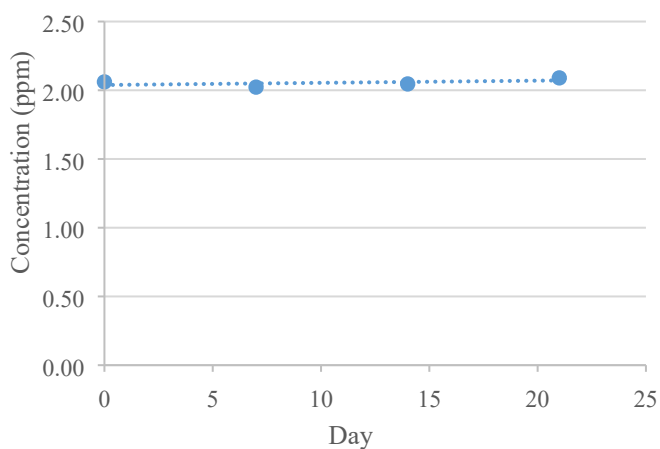

Stability of 4,4'-DDD in second bottle of mix A at -20°C for short-term

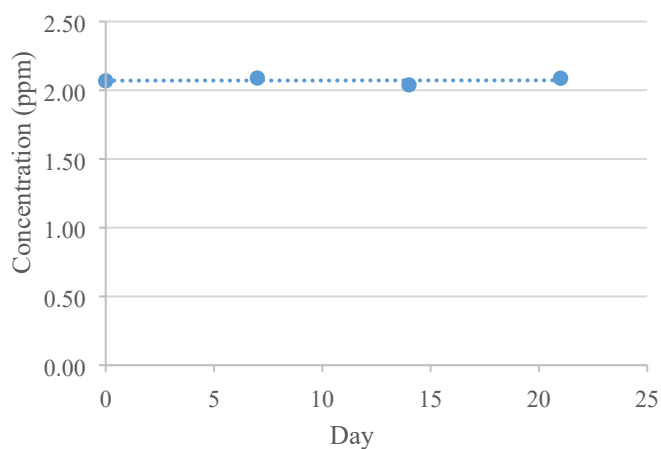

Stability of 4,4'-DDT in first bottle of mix A at -20°C for short-term

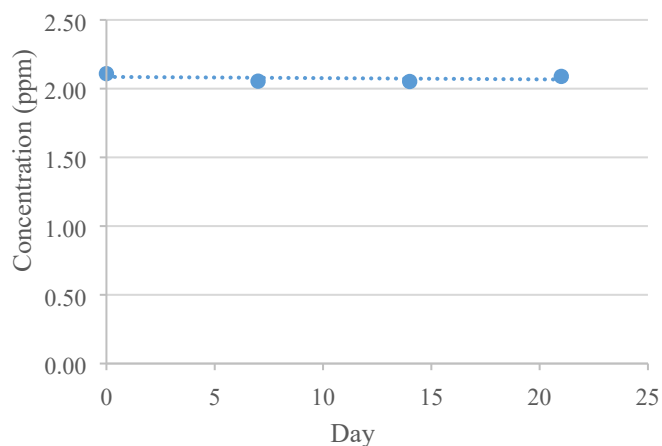

Stability of 4,4'-DDT in second bottle of mix A at -20°C for short-term

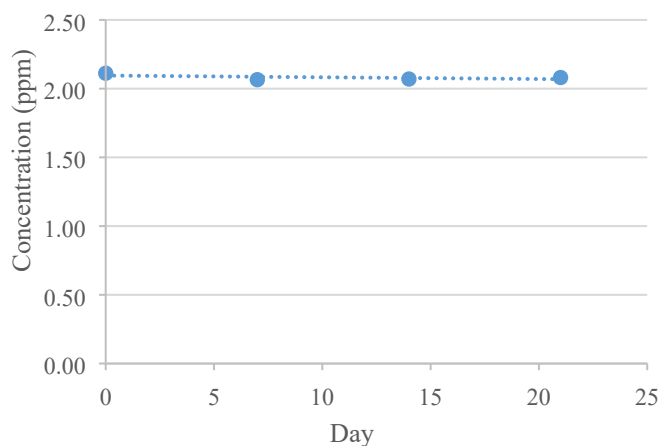

Stability of 2,4'-DDT in first bottle of mix A at -20°C for short-term

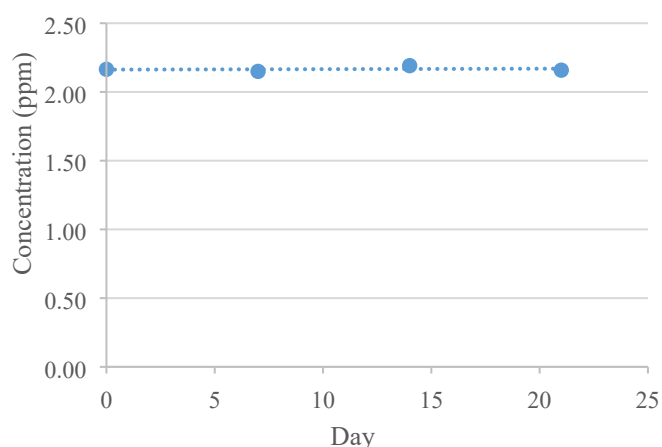

Stability of 2,4'-DDT in second bottle of mix A at -20°C for short-term

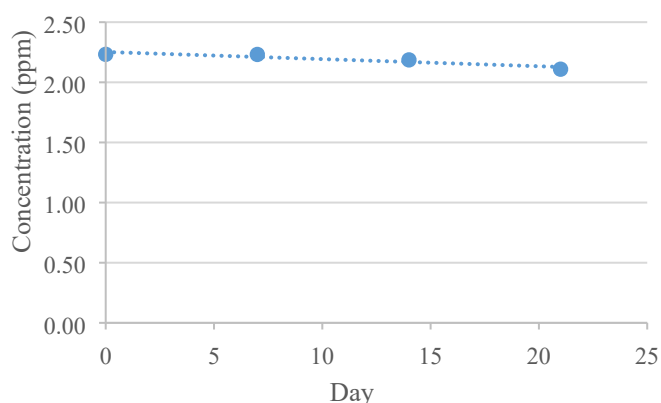

Stability of alpha-endosulfan in first bottle of mix A at -20°C for short-term

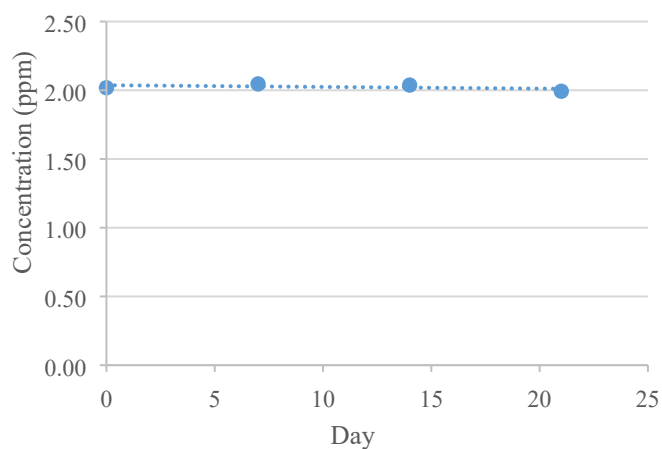

Stability of alpha-endosulfan in second bottle of mix A at -20°C for short-term

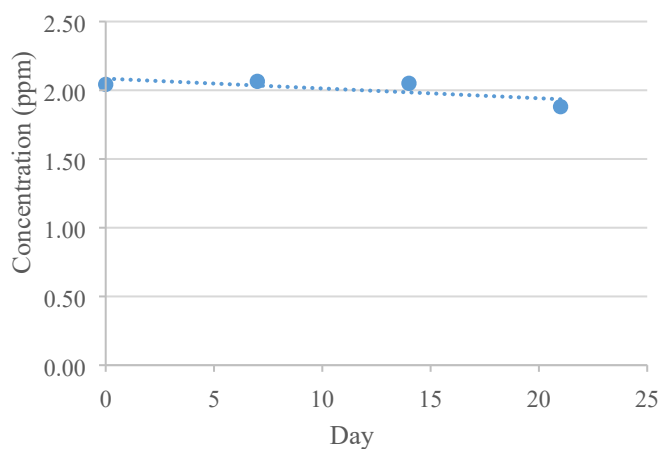

Stability of beta-endosulfan in first bottle of mix A at -20°C for short-term

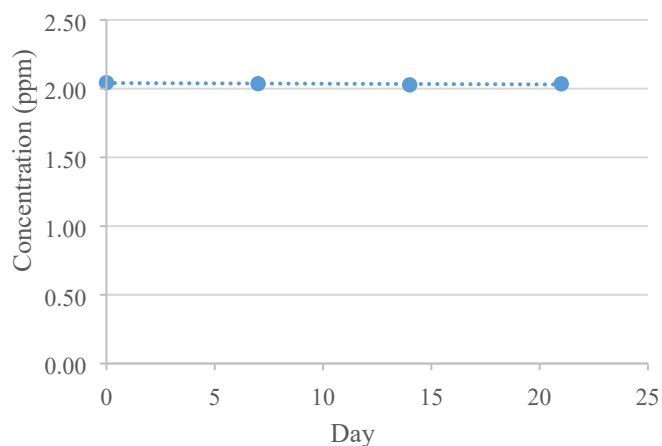

Stability of beta-endosulfan in second bottle of mix A at -20°C for short-term

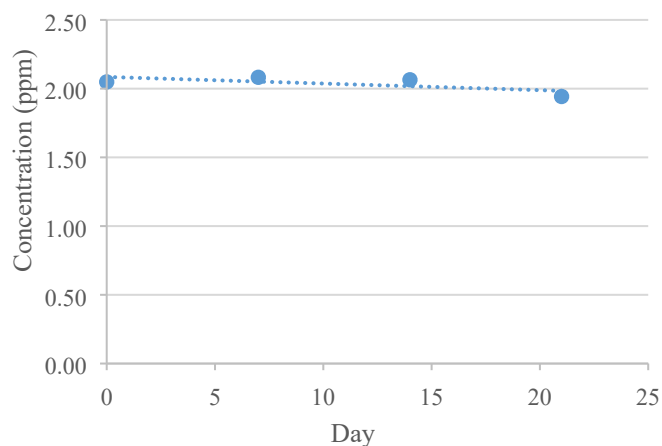

Stability of heptachlor in first bottle of mix A at -20°C for short-term

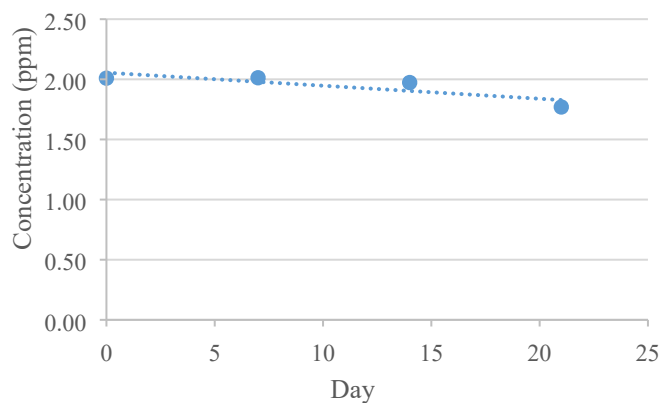

Stability of heptachlor in second bottle of mix A at -20°C for short-term

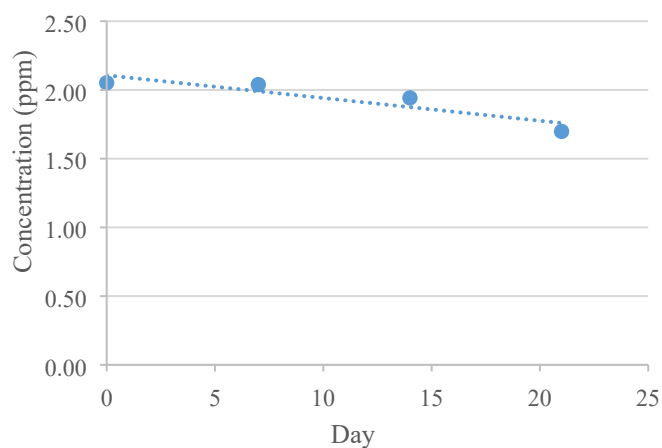

Stability of heptachlor-endo-epoxide in first bottle of mix A at -20°C for short-term

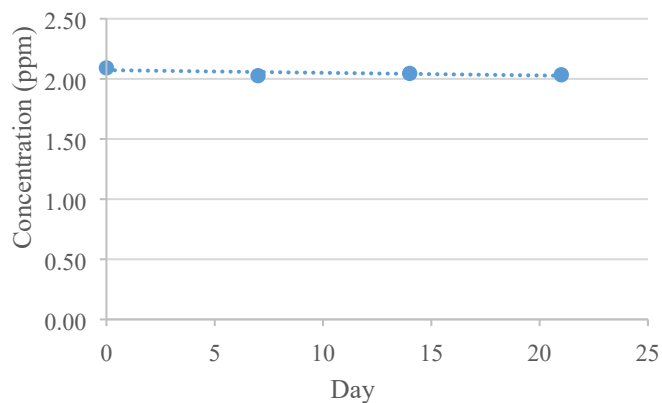

Stability of heptachlor-endo-epoxide in second bottle of mix A at -20°C for short-term

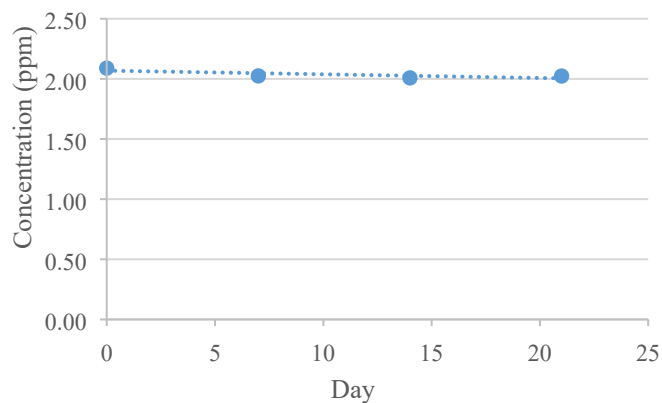

Stability of alpha-HCH in mix B at -20°C for short-term

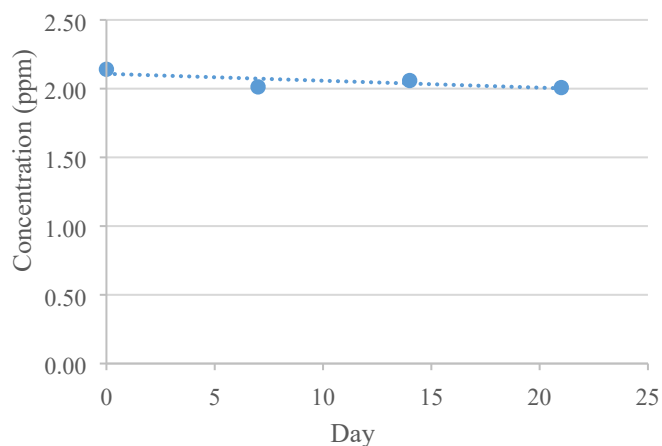

Stability of gamma-HCH in mix B at -20°C for short-term

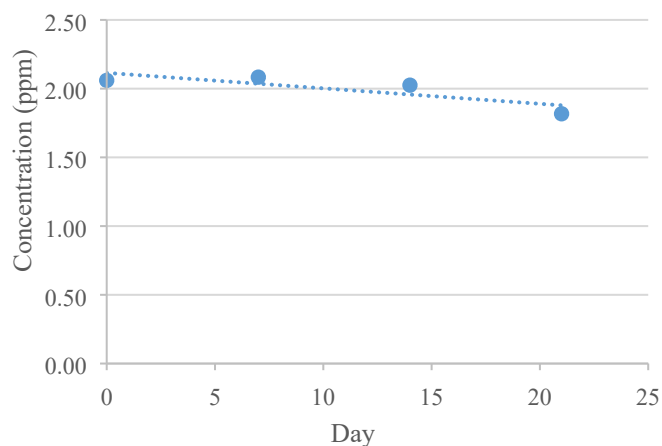

Stability of aldrin in mix B at -20°C for short-term

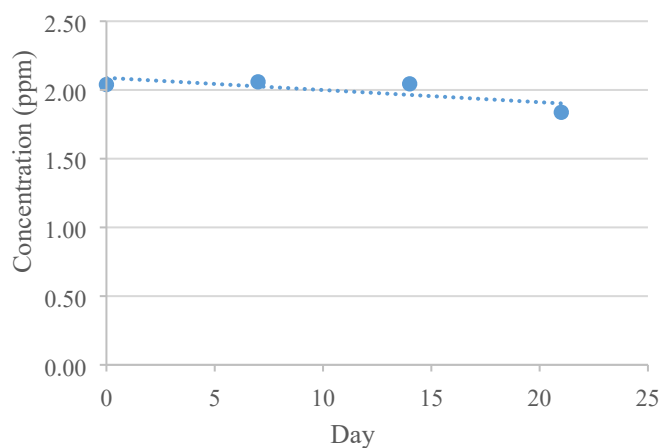

Stability of dieldrin in mix B at -20°C for short-term

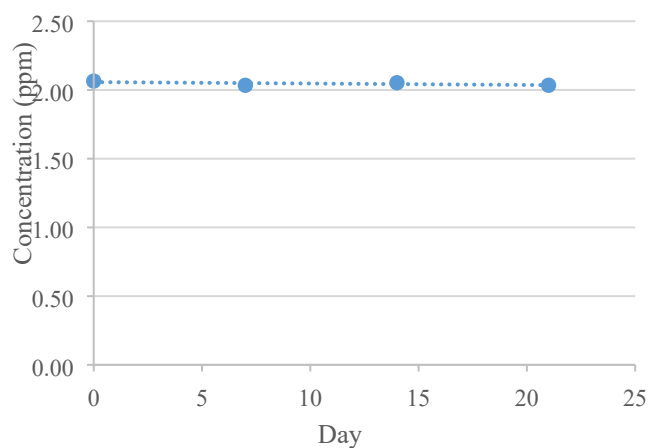

Stability of endrin in mix B at -20°C for short-term

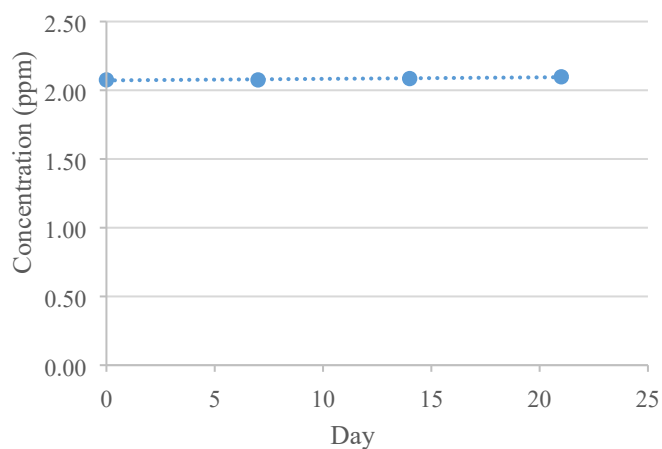

Stability of 4,4'-DDD in first bottle of mix B at -20°C for short-term

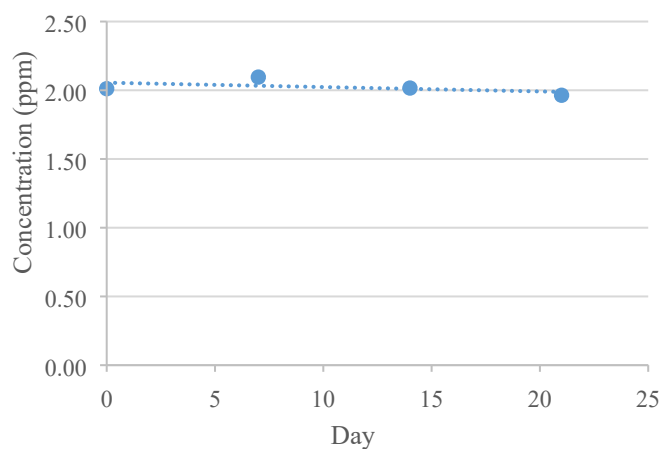

Stability of 2,4'-DDT in mix B at -20°C for short-term

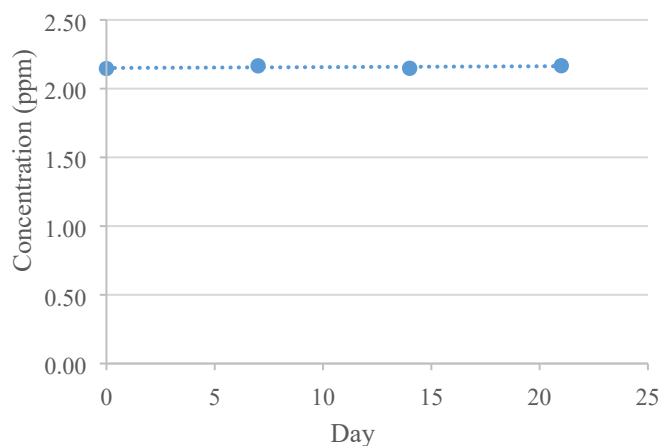

Stability of 4,4'-DDT in mix B at -20°C for short-term

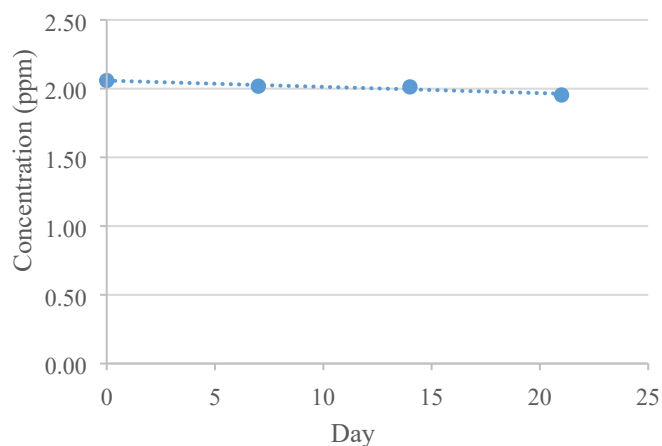

Stability of alpha-endosulfan in mix B at -20°C for short-term

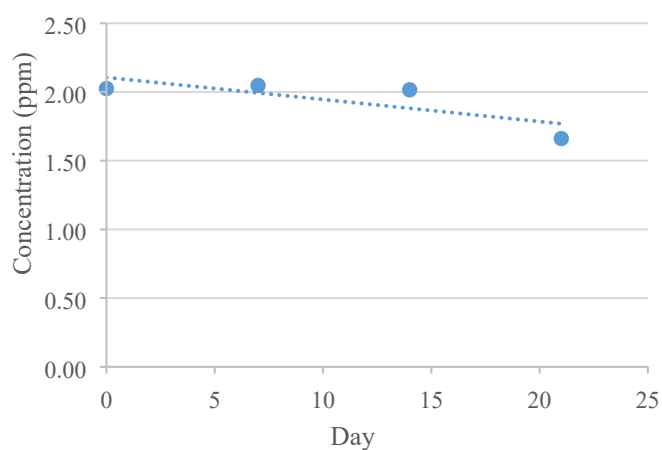

Stability of beta-endosulfan in mix B at -20°C for short-term

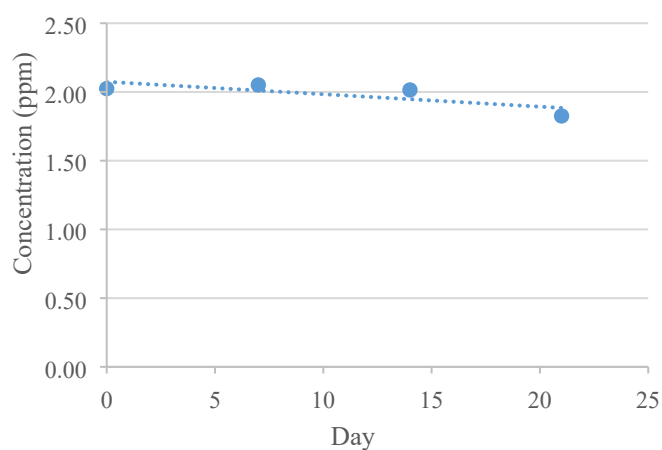

Stability of heptachlor in mix B at -20°C for short-term

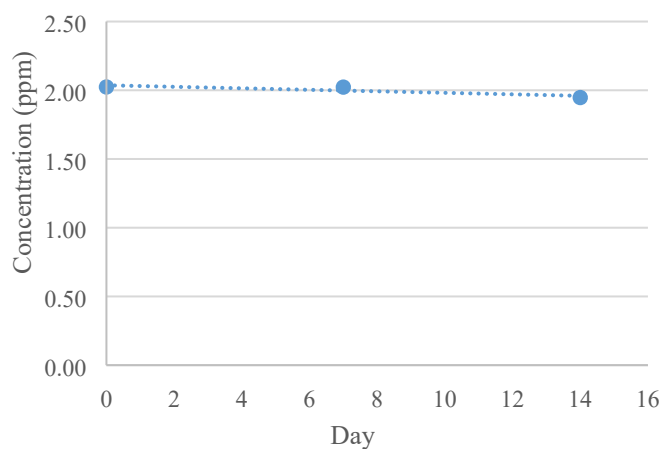

Stability of heptachlor-endo-epoxide in mix B at -20°C for short-term

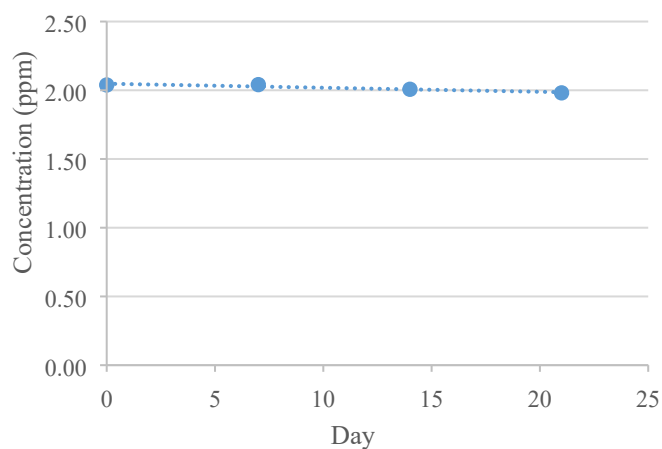



Stability of alpha-HCH in mix A at 20°C  
for short-term

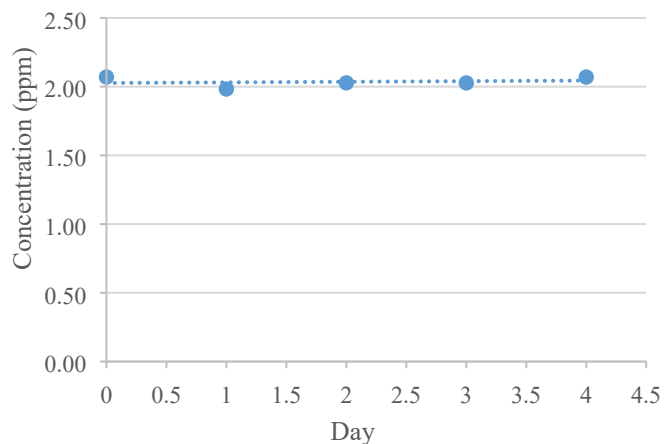

Stability of alpha-HCH in mix B at 20°C  
for short-term

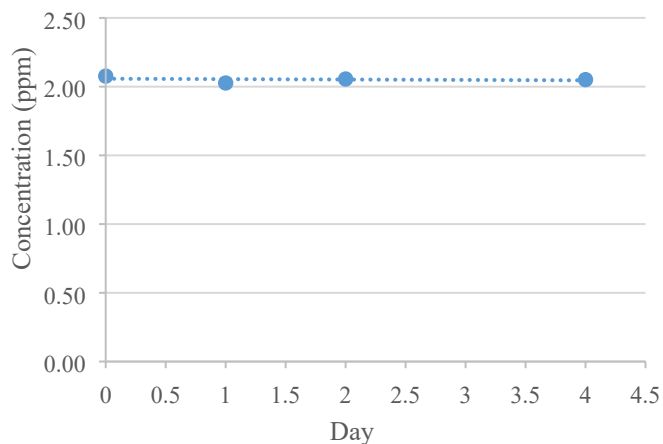

Stability of gamma-HCH in mix A at  
20°C for short-term

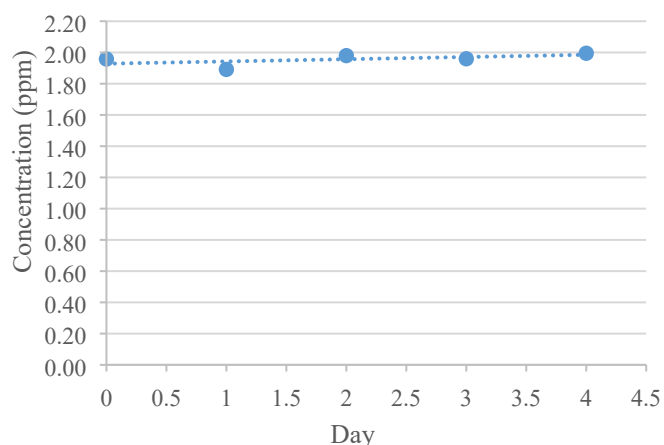

Stability of gamma-HCH in mix B at  
20°C for short-term

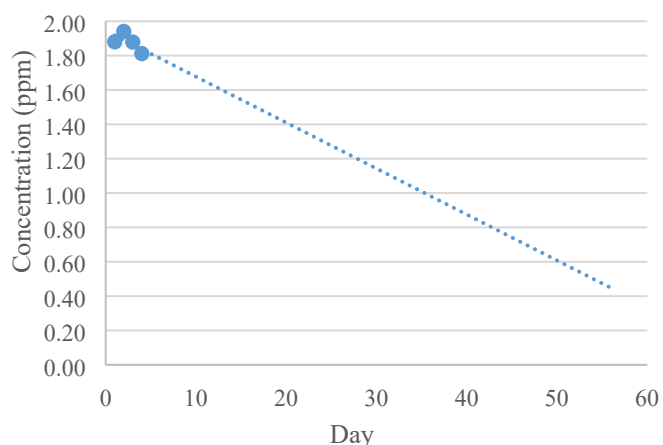

Stability of aldrin in mix A at 20°C  
for short-term

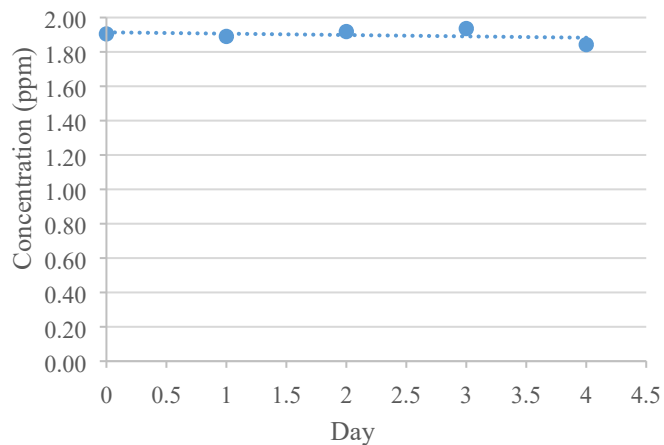

Stability of aldrin in mix B at 20°C for  
short-term

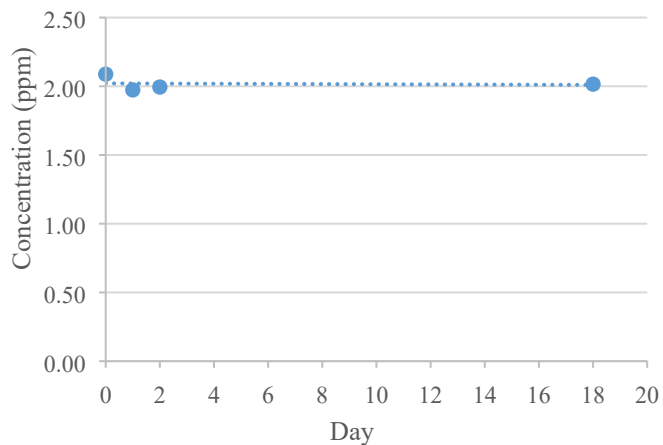

Stability of dieldrin in mix A at 20°C for short-term

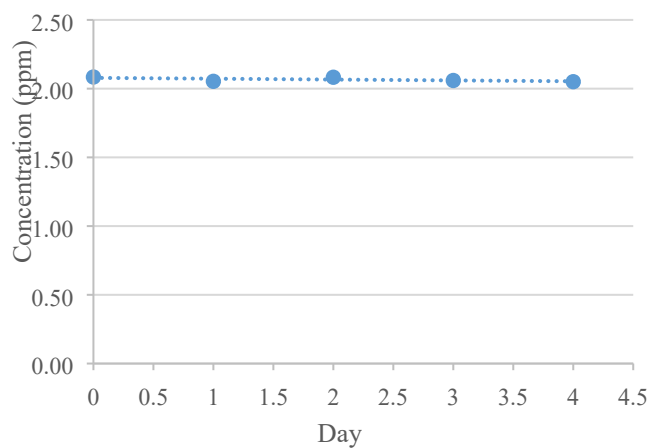

Stability of dieldrin in mix B at 20°C for short-term

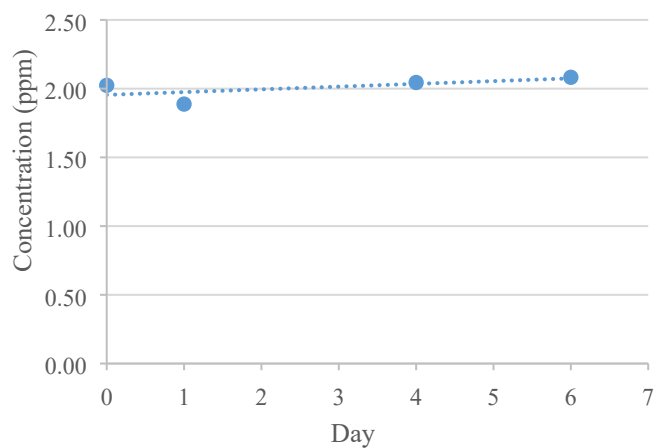

Stability of endrin in mix A at 20°C for short-term

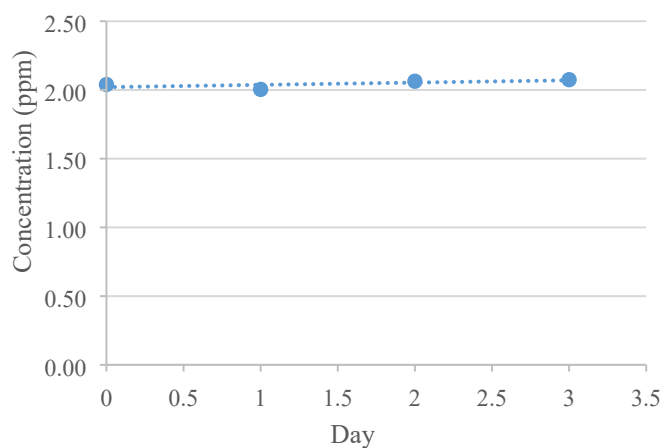

Stability of endrin in mix B at 20°C for short-term

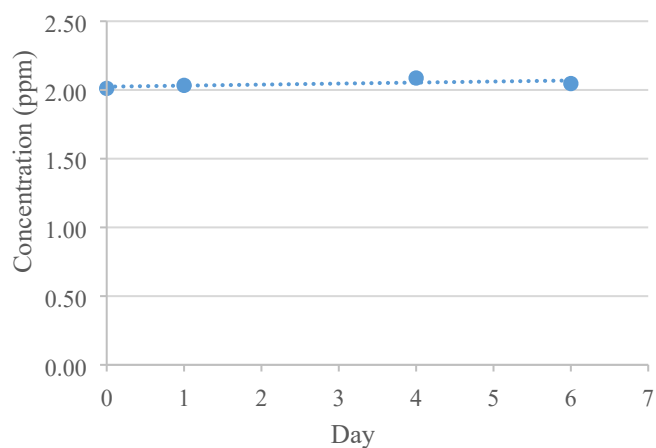

Stability of 4,4'-DDD in mix A at 20°C for short-term

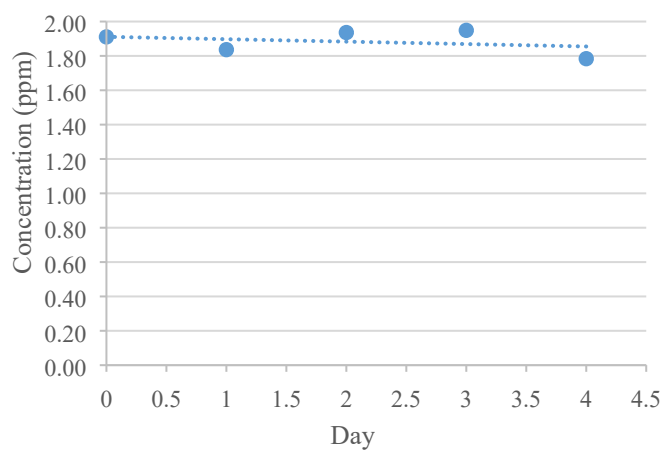

Stability of 4,4'-DDD in mix B at 20°C for short-term

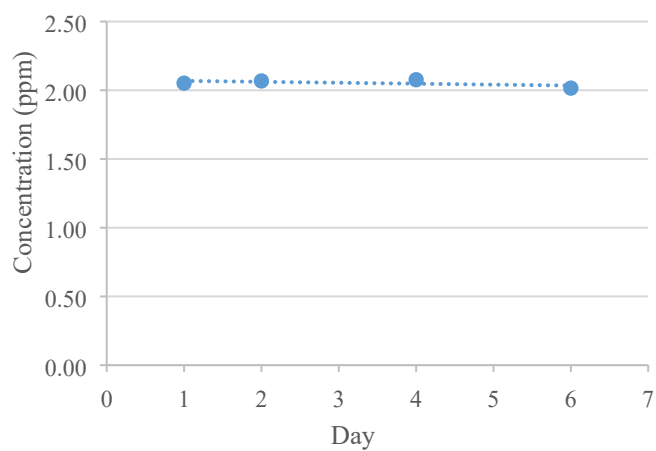

Stability of 4,4'-DDT in mix A at 20°C  
for short-term

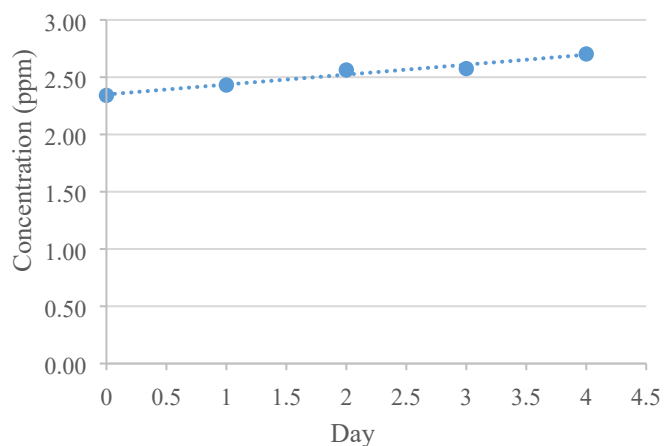

Stability of 4,4'-DDT in mix B at 20°C  
for short-term

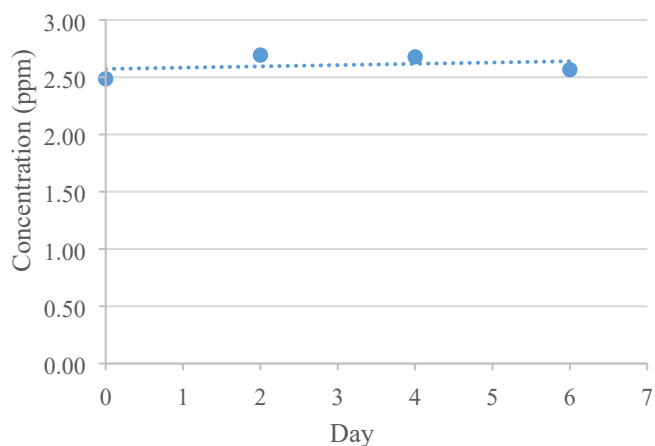

Stability of 2,4'-DDT in mix A at 20°C  
for short-term

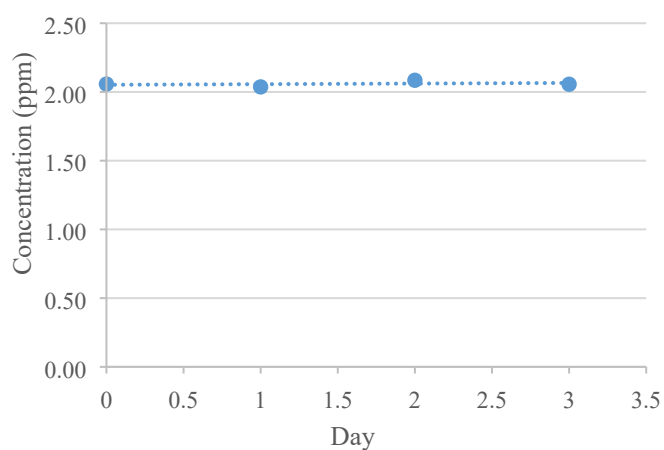

Stability of 2,4'-DDT in mix B at 20°C  
for short-term

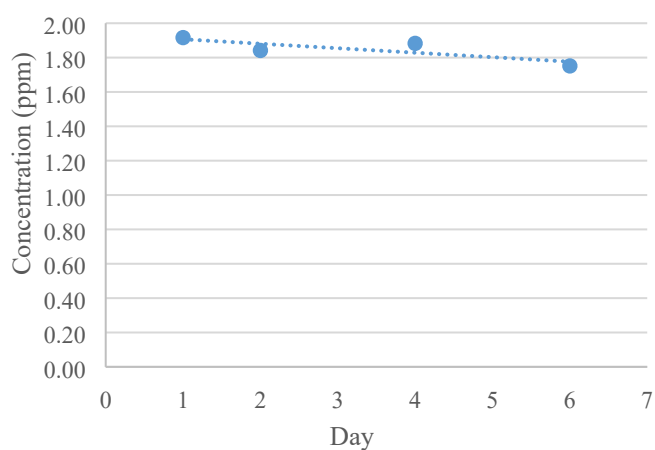

Stability of alpha-endosulfan in mix A at  
20°C for short-term

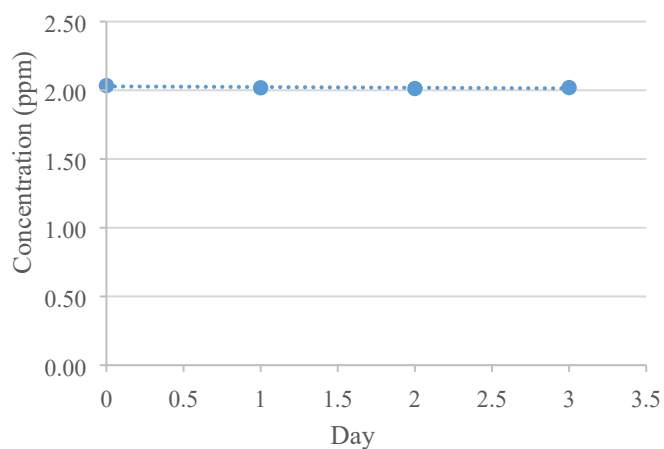

Stability of alpha-endosulfan in mix B at  
20°C for short-term

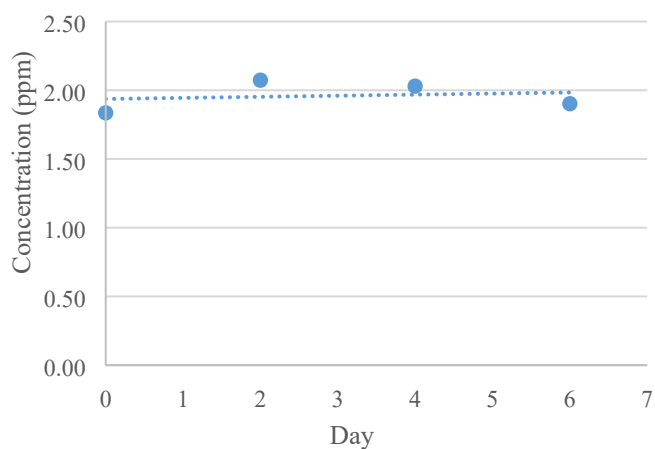

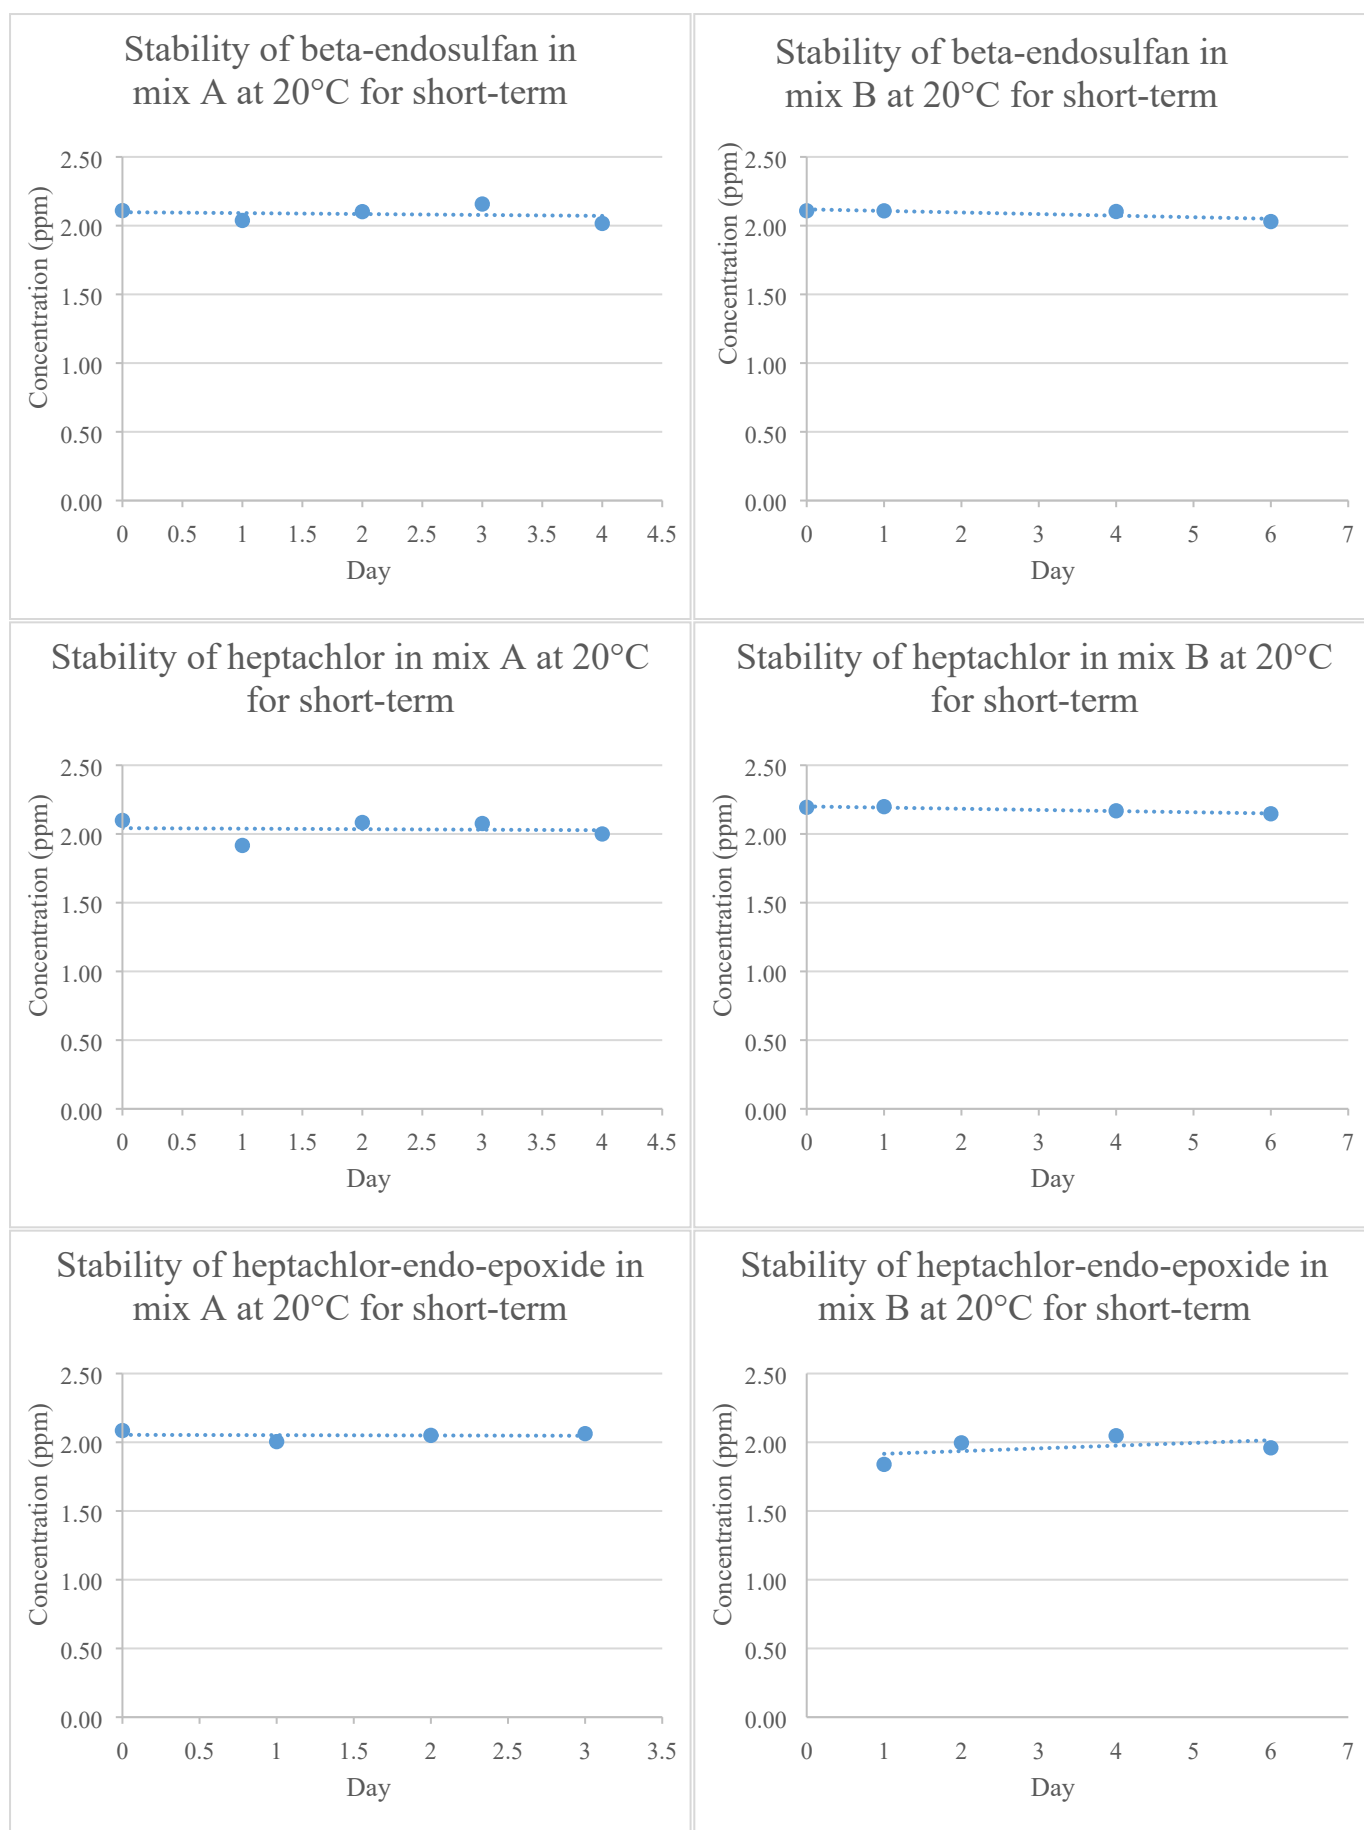

**Fig. S5** The plots of gravimetric mixtures (A and B) in short term stability at 20°C for each pesticide

Stability of alpha-HCH in first bottle of mix A at +4°C for short-term

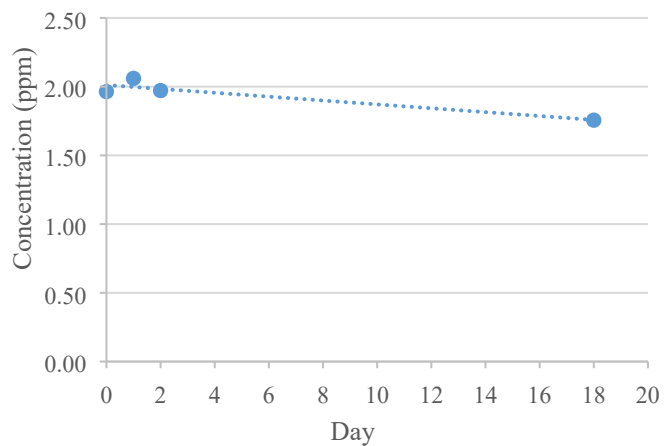

Stability of alpha-HCH in second bottle of mix A at +4°C for short-term

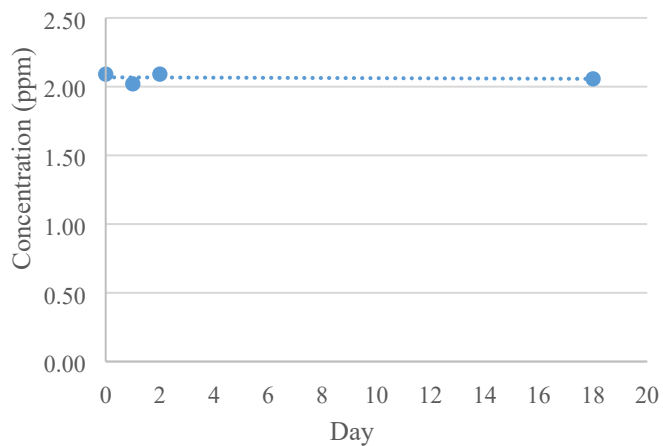

Stability of alpha-HCH in mix B at +4°C for short-term

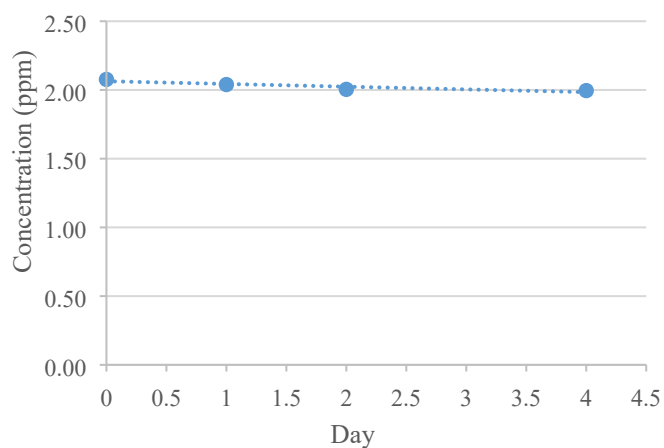

Stability of gamma-HCH in first bottle of mix A at +4°C for short-term

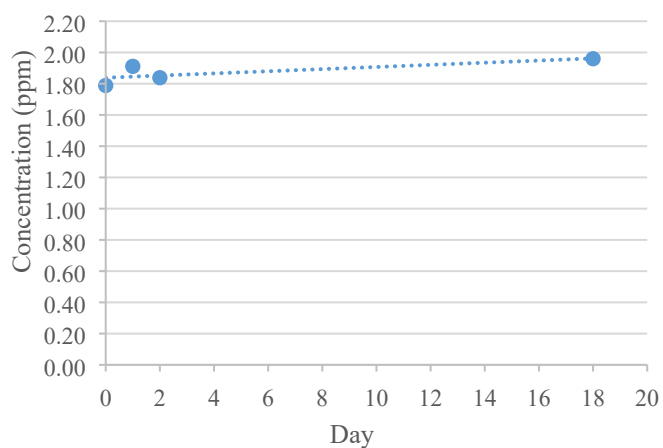

Stability of gamma-HCH in second bottle of mix A at +4°C for short-term

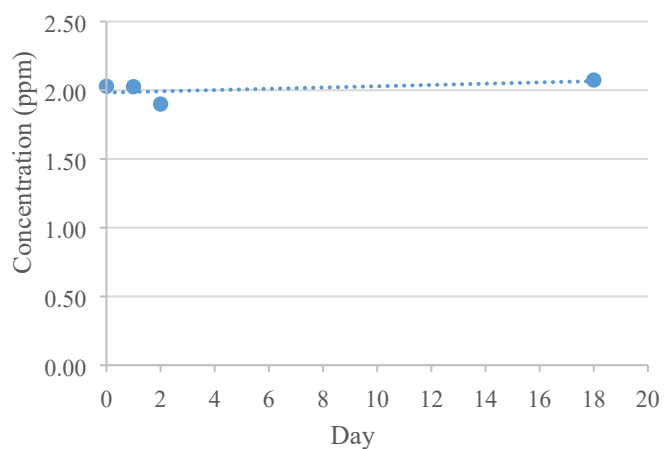

Stability of gamma-HCH in mix B at +4°C for short-term

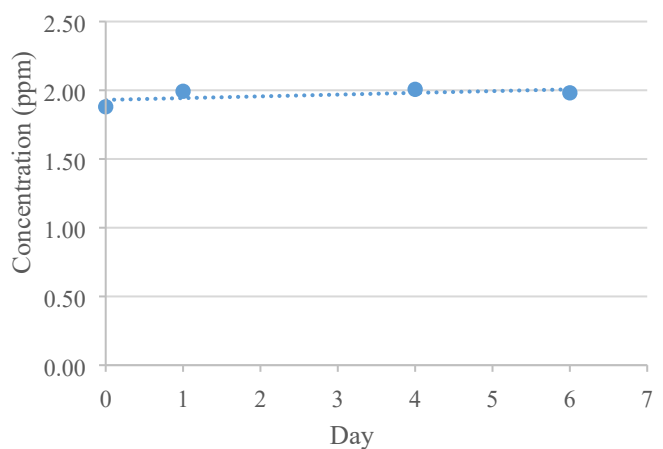

Stability of aldrin in first bottle of mix A at +4°C for short-term

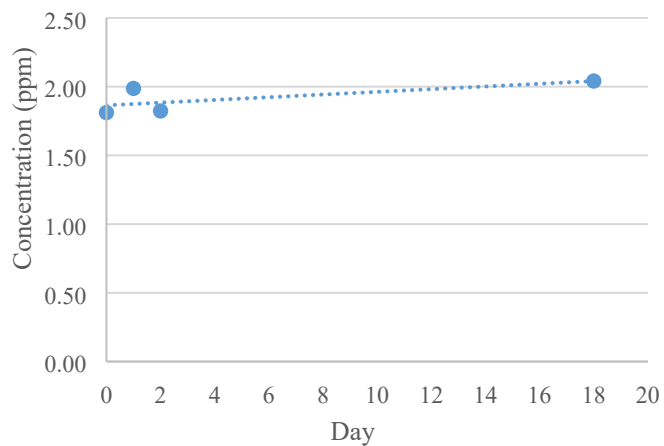

Stability of aldrin in second bottle of mix A at +4°C for short-term

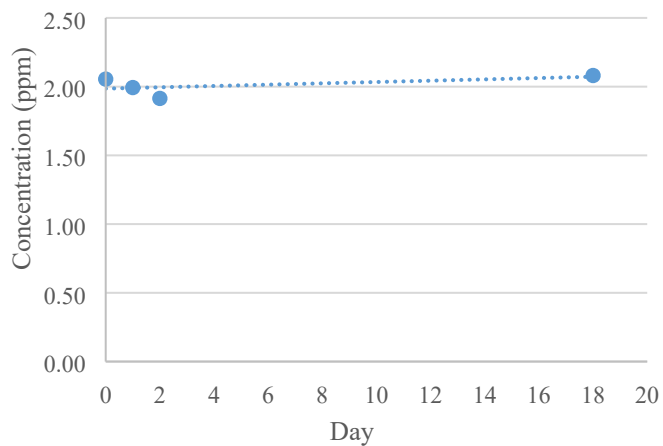

Stability of aldrin in mix B at +4°C for short-term

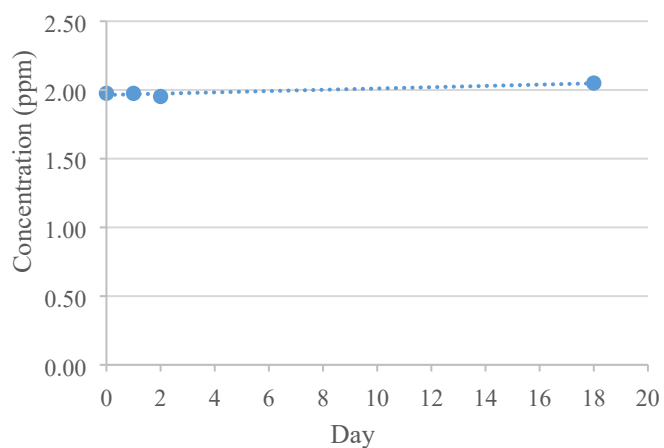

Stability of dieldrin in first bottle of mix A at +4°C for short-term

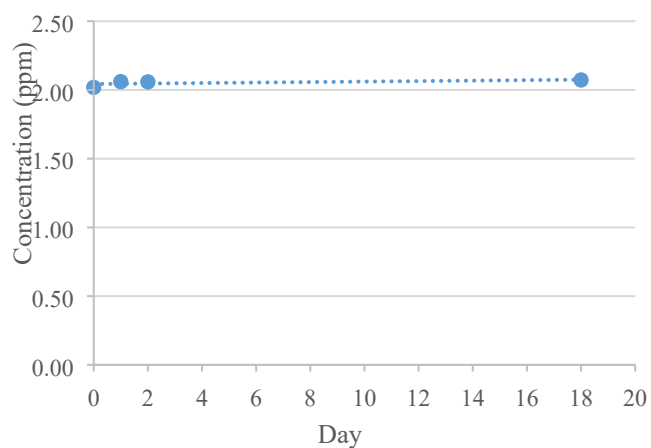

Stability of dieldrin in second bottle of mix A at +4°C for short-term

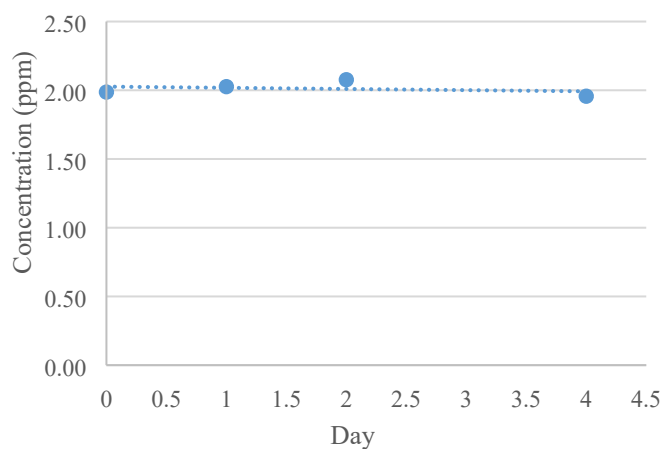

Stability of dieldrin in of mix B at +4°C for short-term

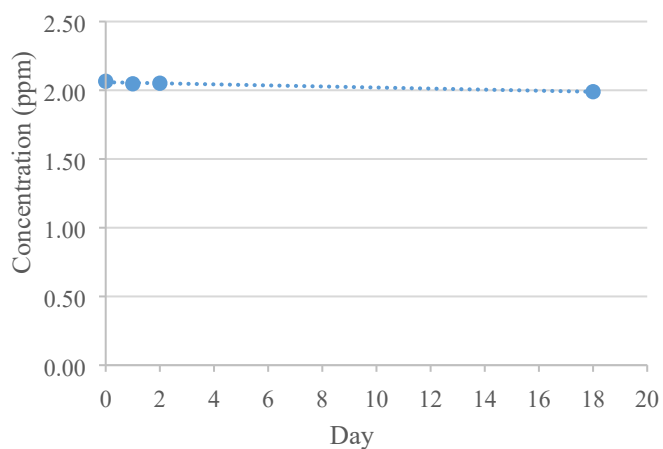

Stability of endrin in first bottle of mix A at +4°C for short-term

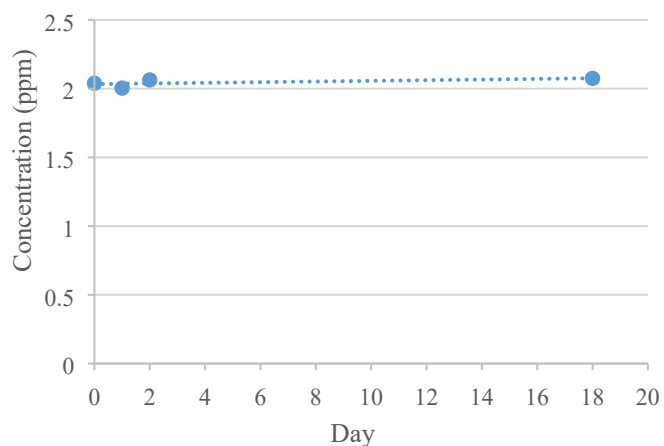

Stability of endrin in second bottle of mix A at +4°C for short-term

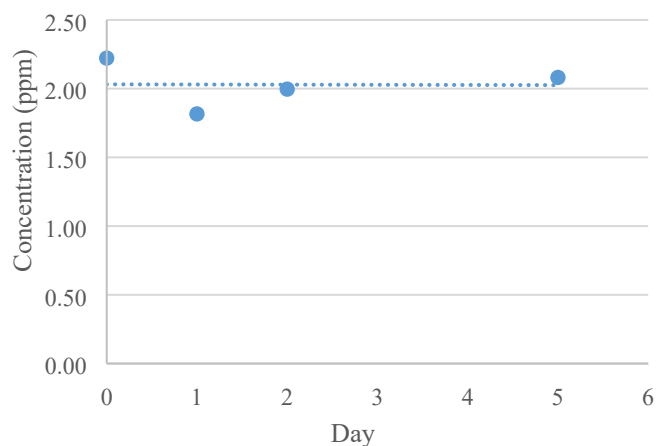

Stability of endrin in mix B at +4°C for short-term

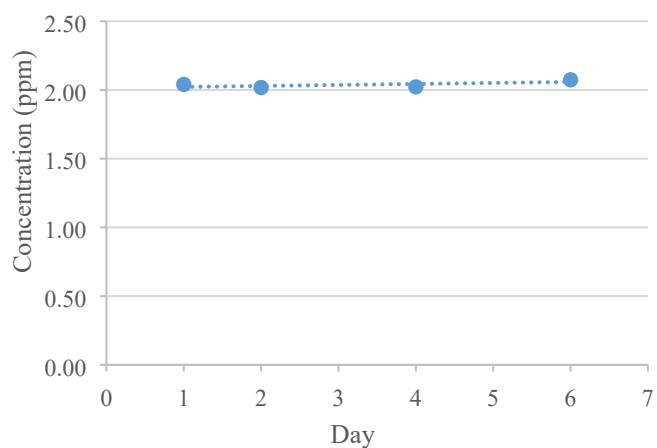

Stability of 4,4'-DDD in first bottle of mix A at +4°C for short-term

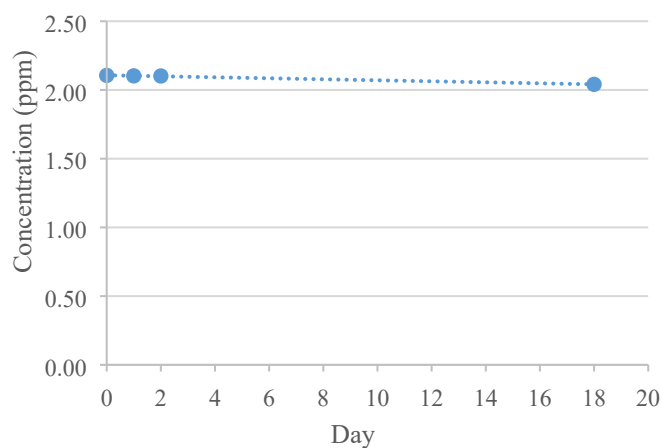

Stability of 4,4'-DDD in second bottle of mix A at +4°C for short-term

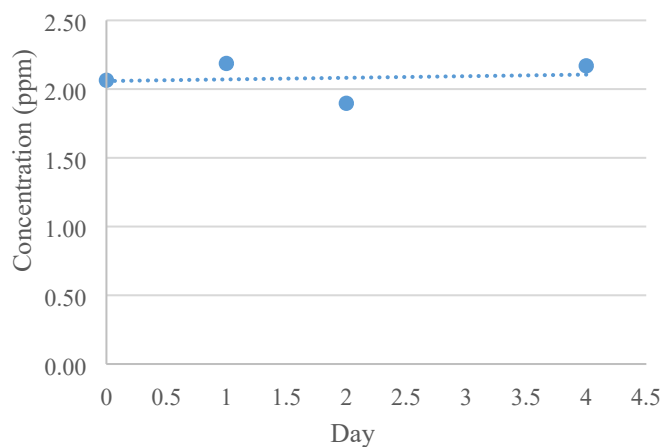

Stability of 4,4'-DDD in mix B at +4°C for short-term

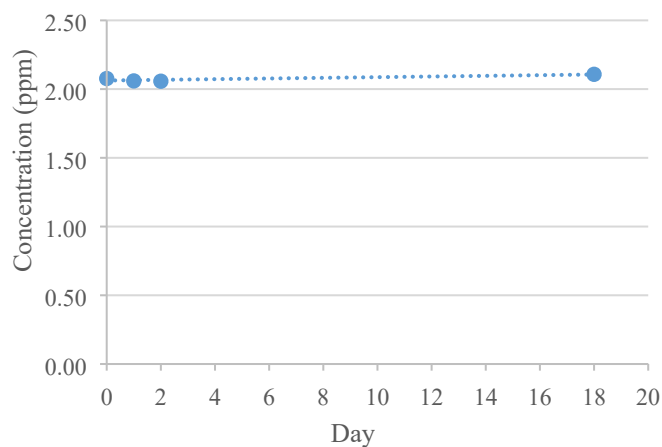

Stability of 4,4'-DDT in first bottle of mix A at +4°C for short-term

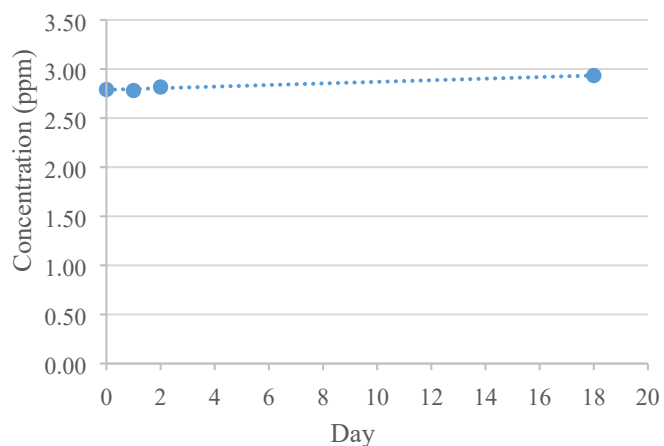

Stability of 4,4'-DDT in second bottle of mix A at +4°C for short-term

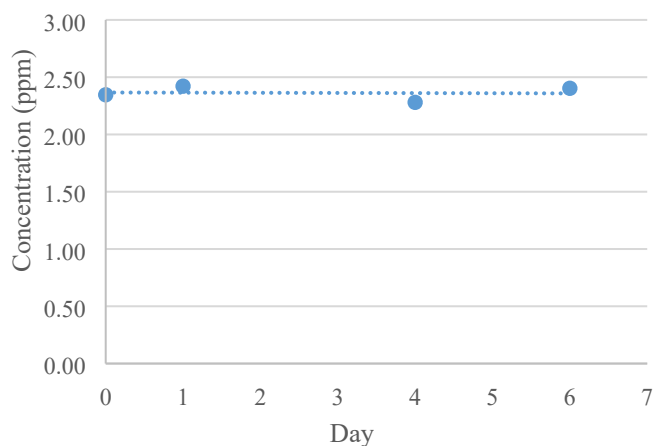

Stability of 4,4'-DDT in mix B at +4°C for short-term

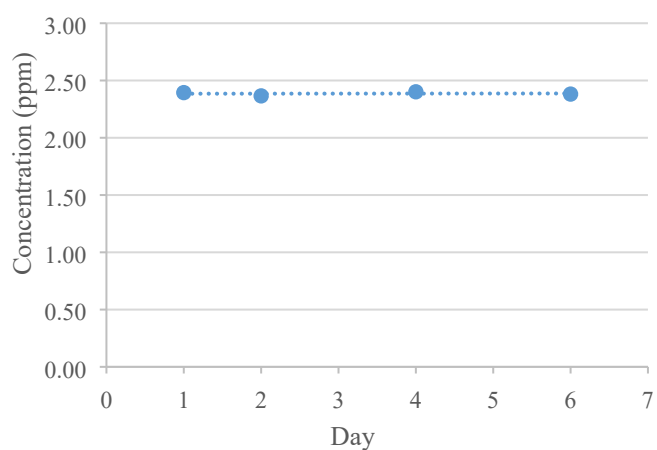

Stability of 2,4'-DDT in first bottle of mix A at +4°C for short-term

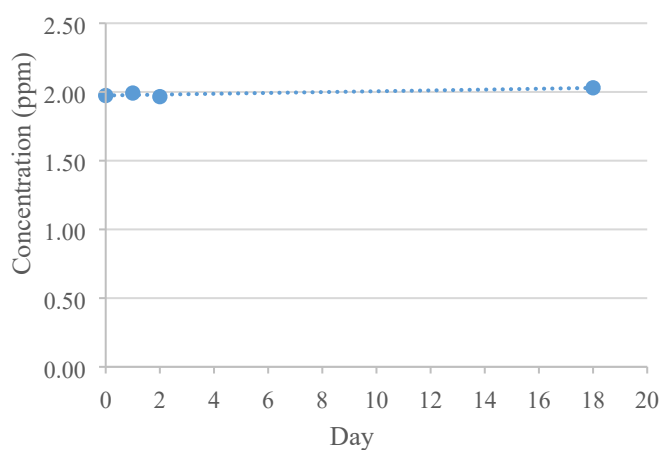

Stability of 2,4'-DDT in second bottle of mix A at +4°C for short-term

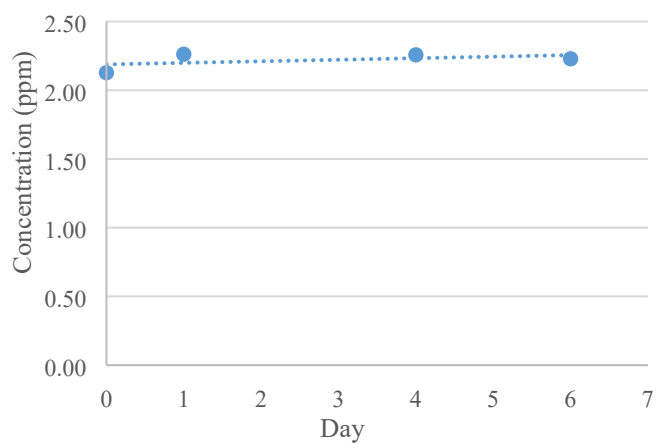

Stability of 2,4'-DDT in mix B at +4°C for short-term

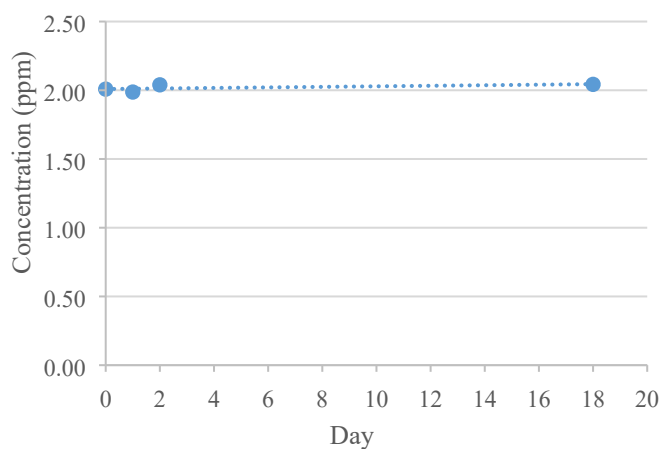



Stability of alpha-endosulfan in first bottle of mix A at +4°C for short-term

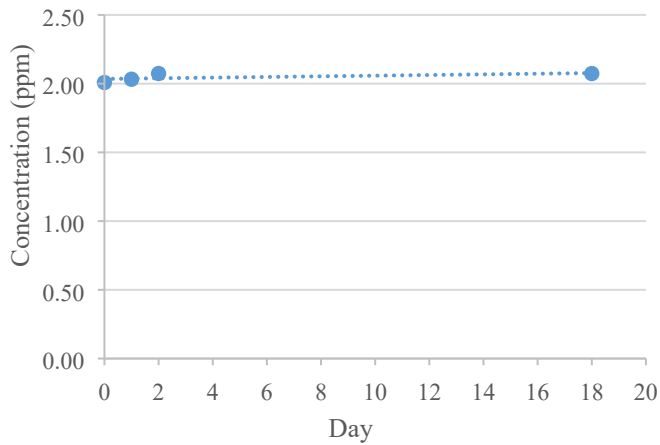

Stability of alpha-endosulfan in second bottle of mix A at +4°C for short-term

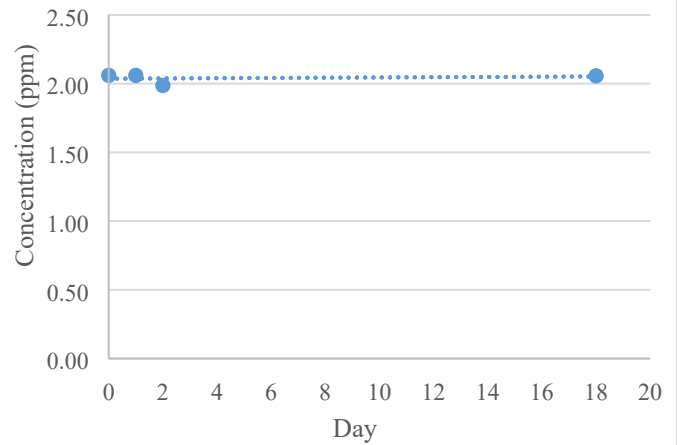

Stability of alpha-endosulfan in mix B at +4°C for short-term

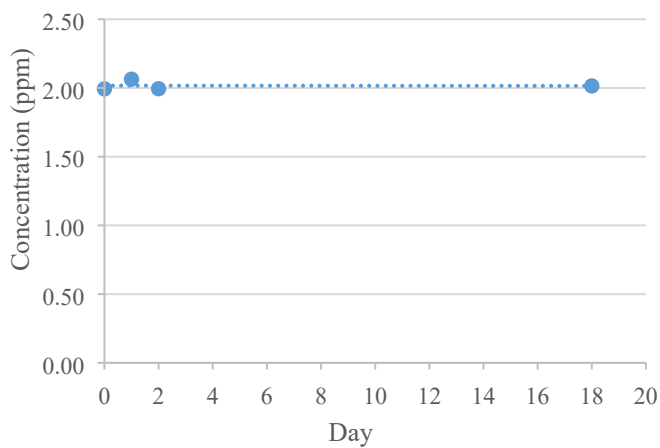

Stability of beta-endosulfan in first bottle of mix A at +4°C for short-term

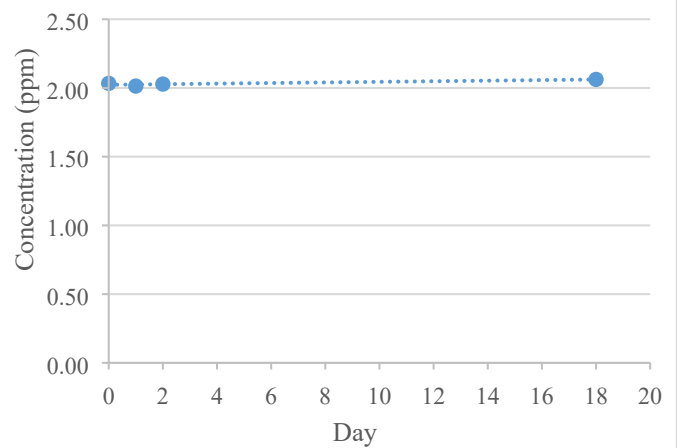

Stability of beta-endosulfan in second bottle of mix A at +4°C for short-term

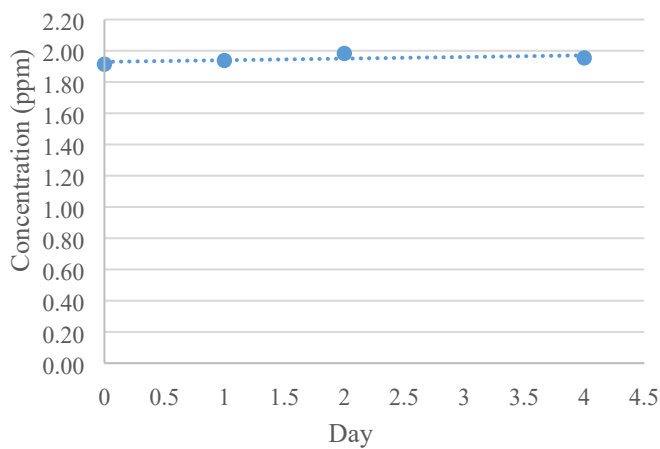

Stability of beta-endosulfan in mix B at +4°C for short-term

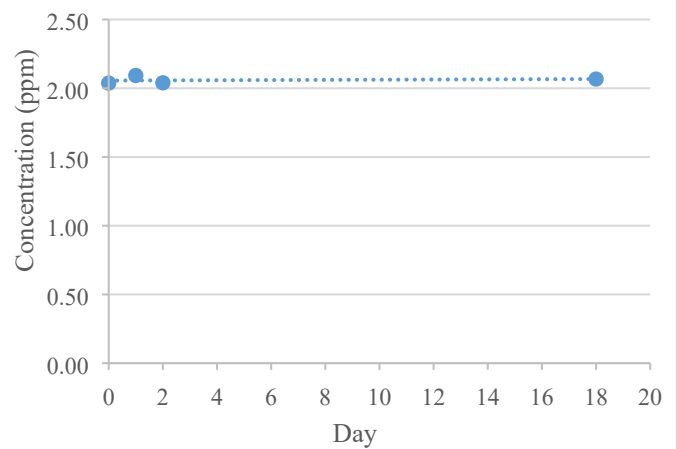

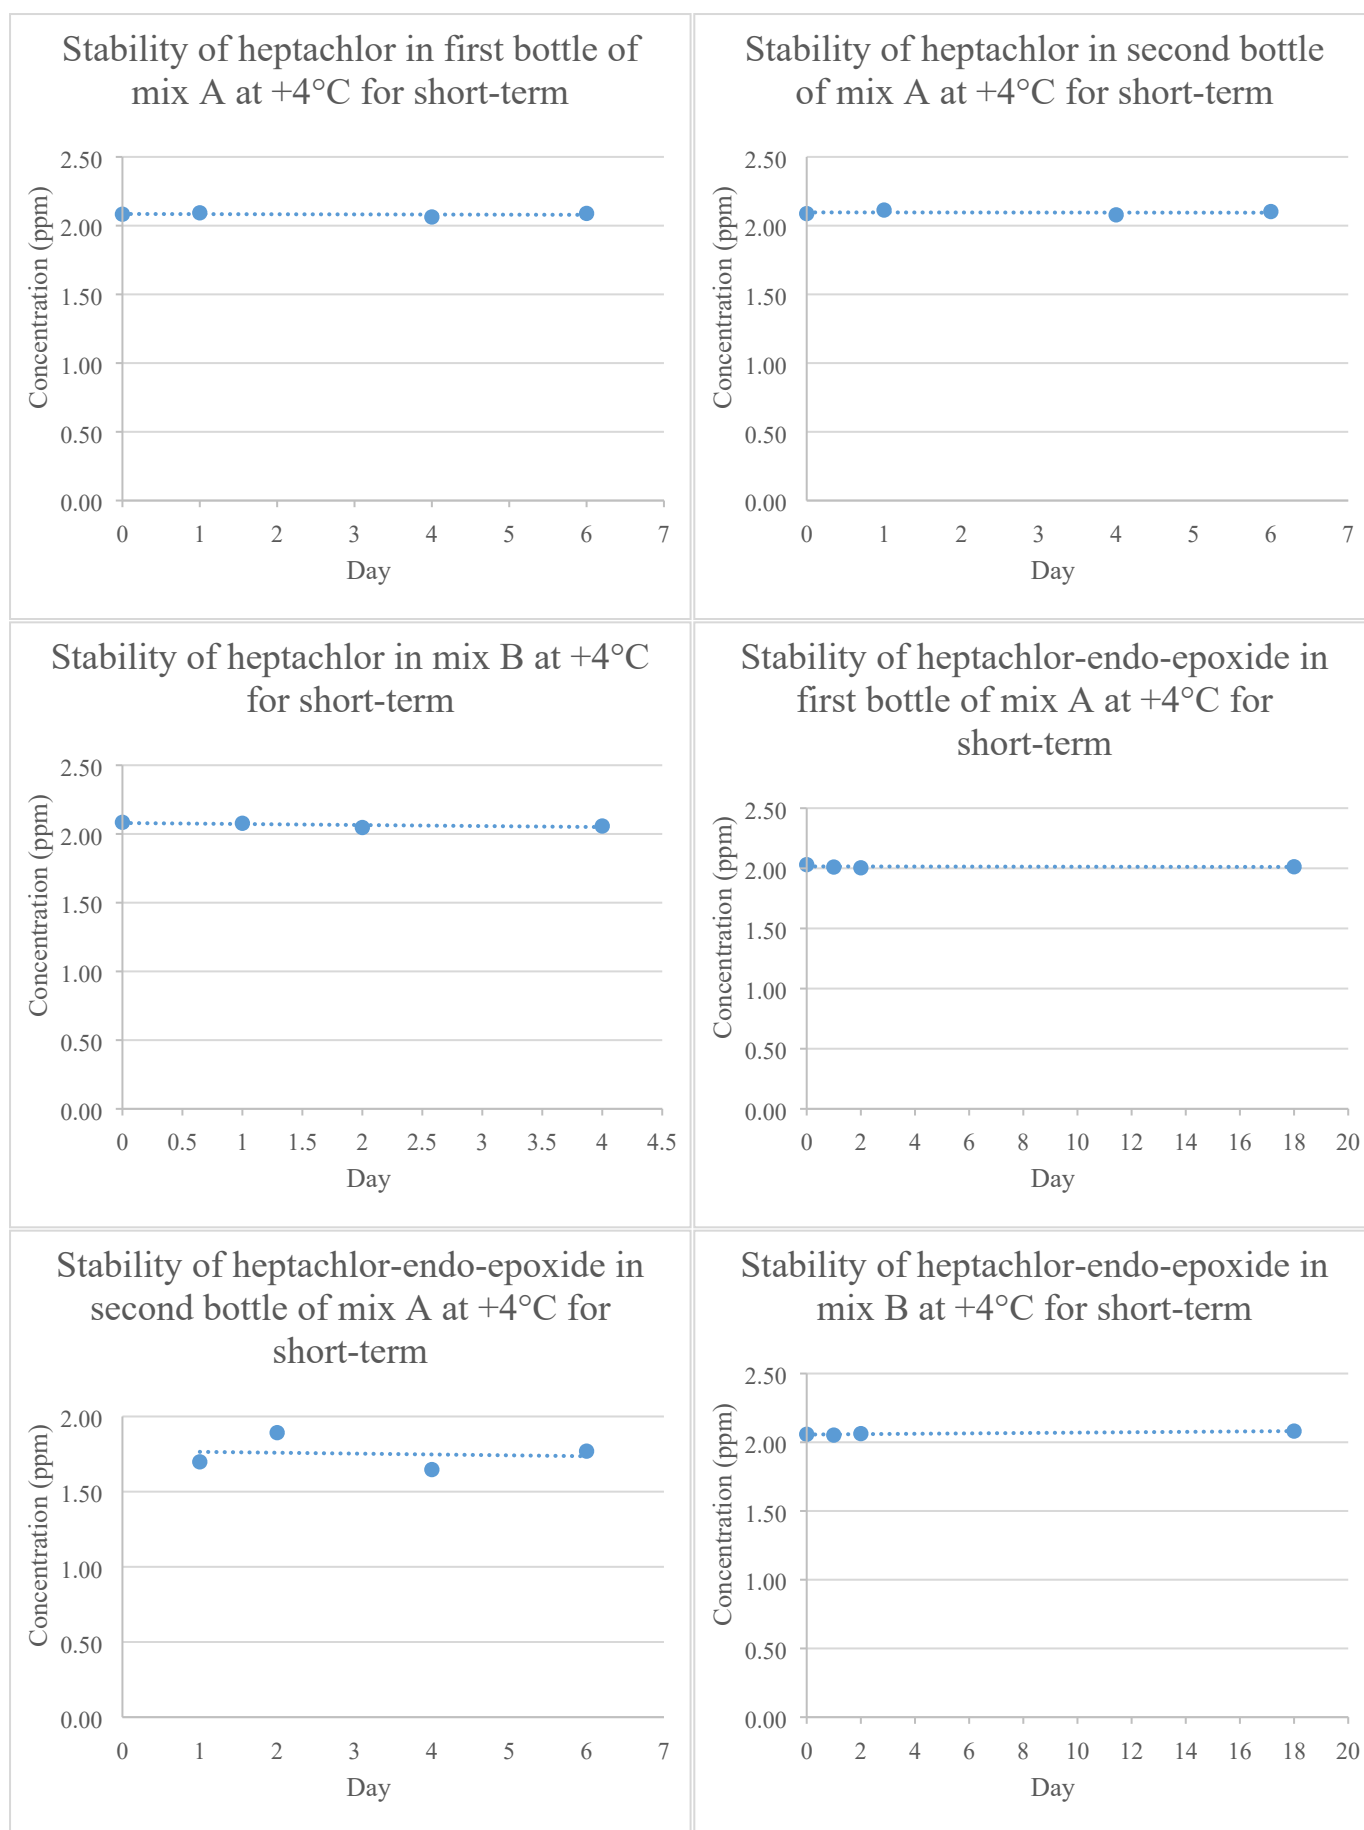

**Fig. S6** The plots of gravimetric mixtures (A and B) in short term stability at +4°C for each pesticide

Stability of alpha-HCH in first bottle of mix A at -20°C for long-term

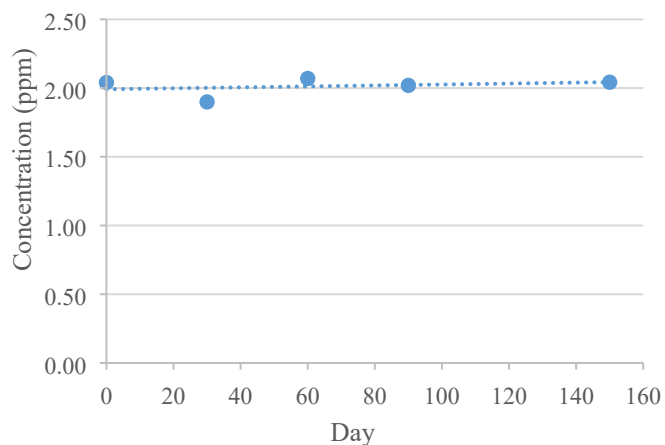

Stability of alpha-HCH in second bottle of mix A at -20°C for long-term

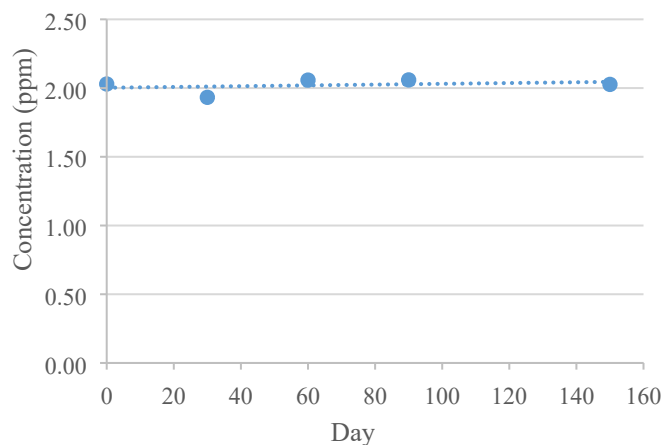

Stability of alpha-HCH in mix B at -20°C for long-term

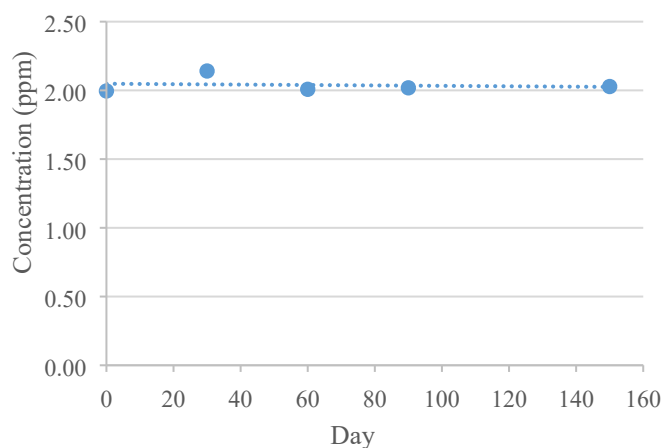

Stability of gamma-HCH in first bottle of mix A at -20°C for long-term

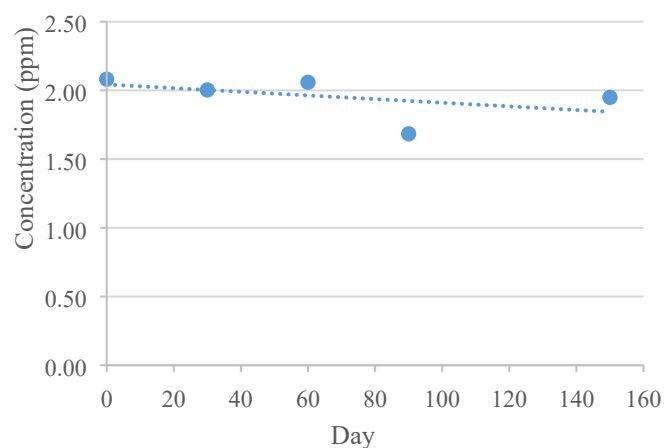

Stability of gamma-HCH in second bottle of mix A at -20°C for long-term

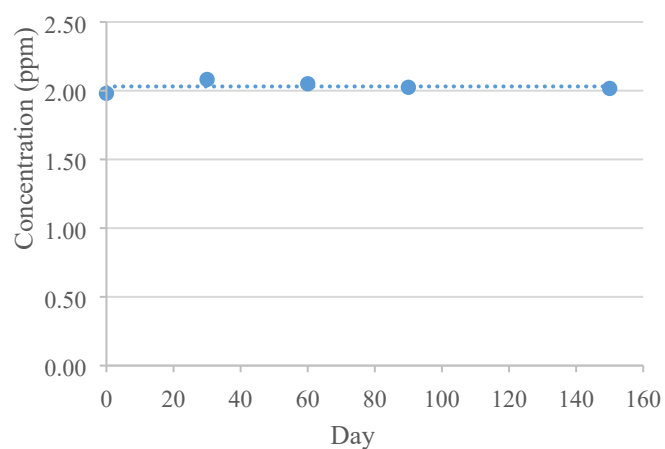

Stability of gamma-HCH in mix B at -20°C for long-term

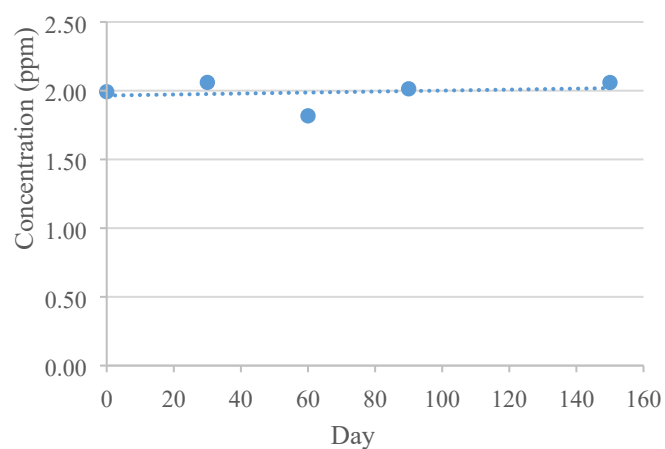

Stability of aldrin in first bottle of mix A at -20°C for long-term

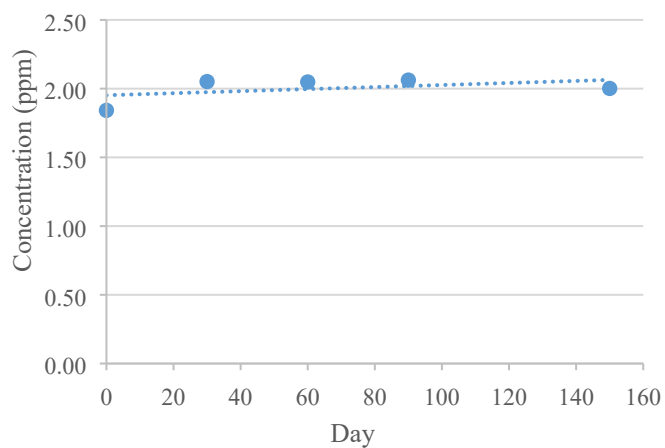

Stability of aldrin in second bottle of mix A at -20°C for long-term

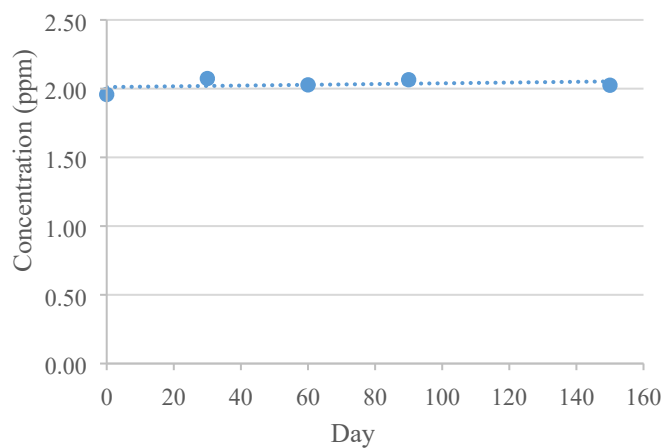

Stability of aldrin in mix B at -20°C for long-term

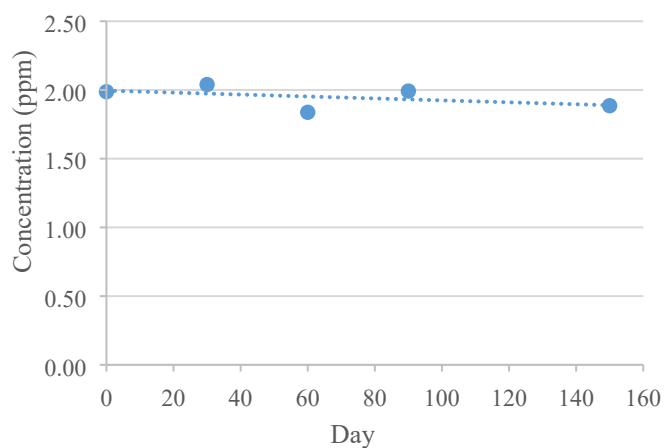

Stability of dieldrin in first bottle of mix A at -20°C for long-term

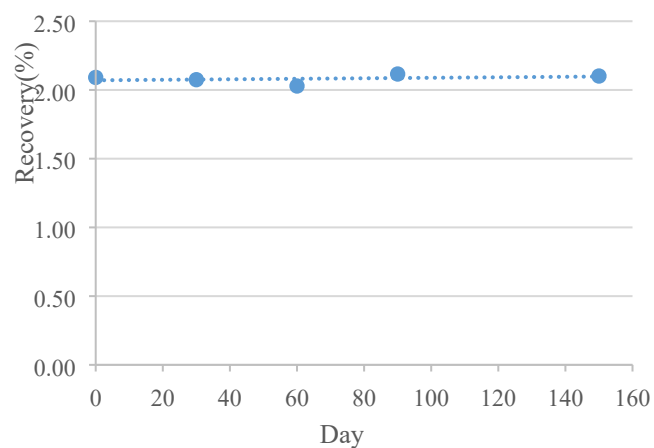

Stability of dieldrin in second bottle of mix A at -20°C for long-term

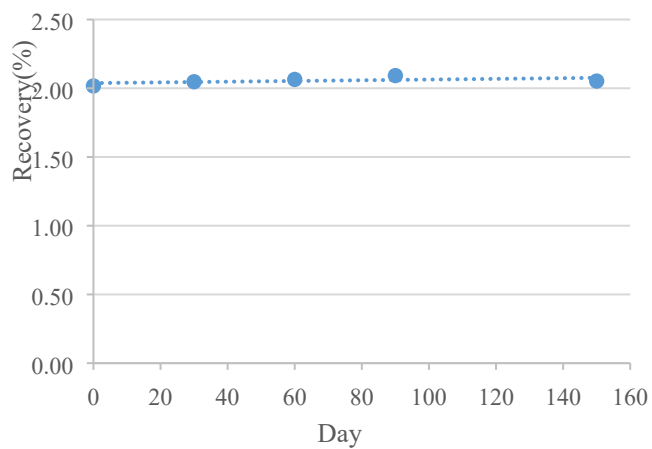

Stability of dieldrin in mix B at -20°C for long-term

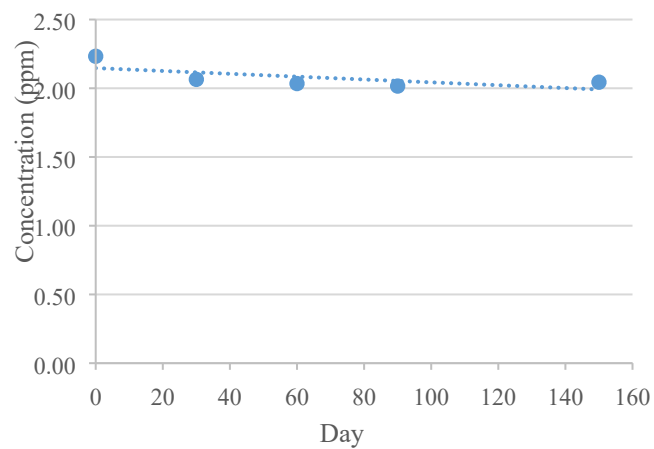

Stability of endrin in first bottle of mix A at -20°C for long term

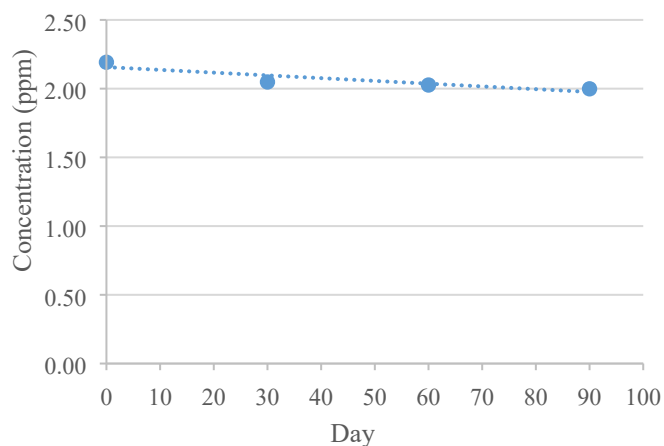

Stability of endrin in second bottle of mix A at -20°C for long-term

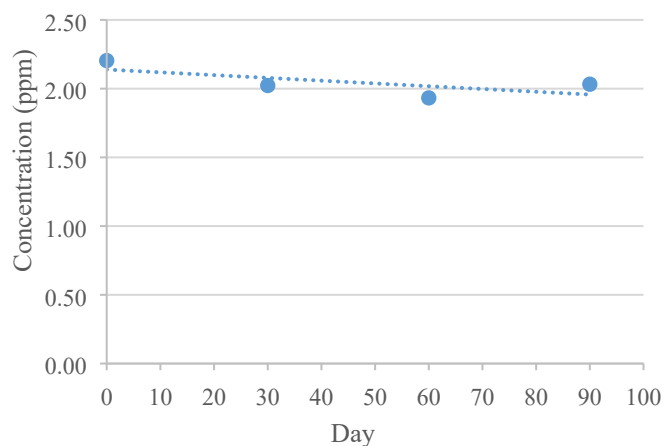

Stability of endrin in mix B at -20°C for long-term

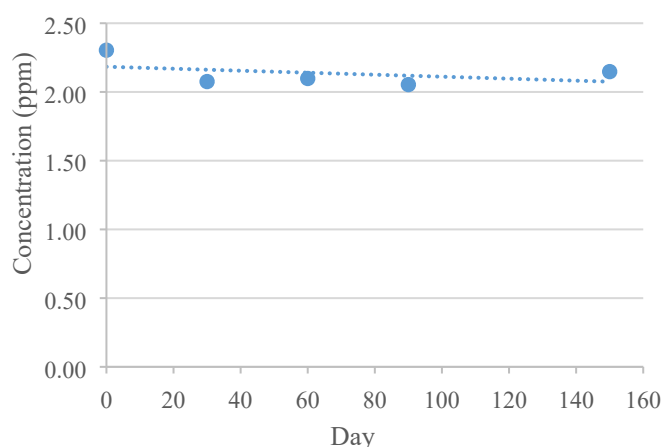

Stability of 4,4'-DDD in second bottle of mix A at -20°C for long-term

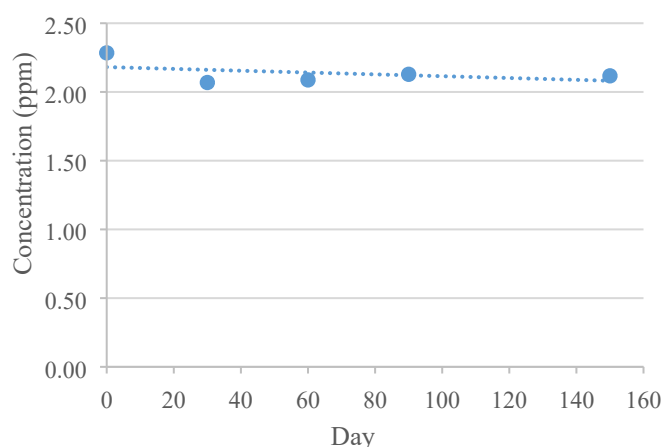

Stability of 4,4'-DDD in first bottle of mix A at -20°C for long-term

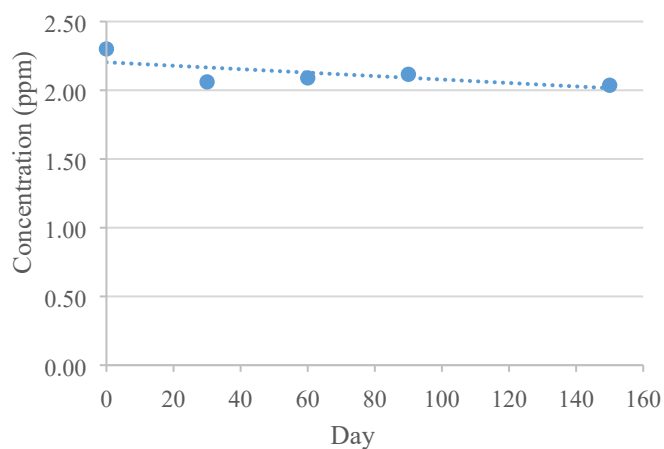

Stability of 4,4'-DDD in mix B at -20°C for long-term

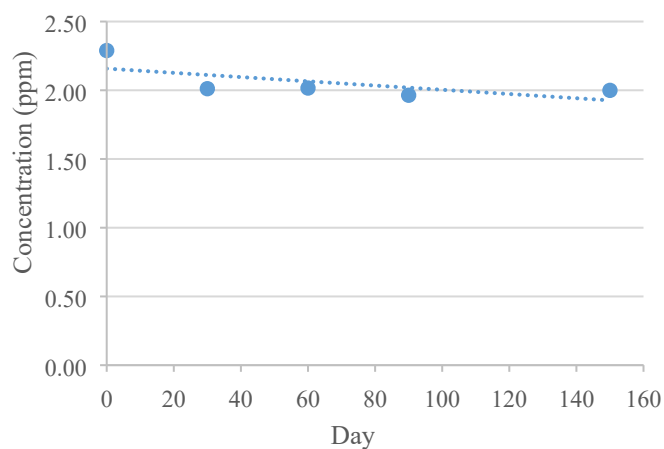

Stability of 4,4'-DDT in first bottle of mix A at -20°C for long-term

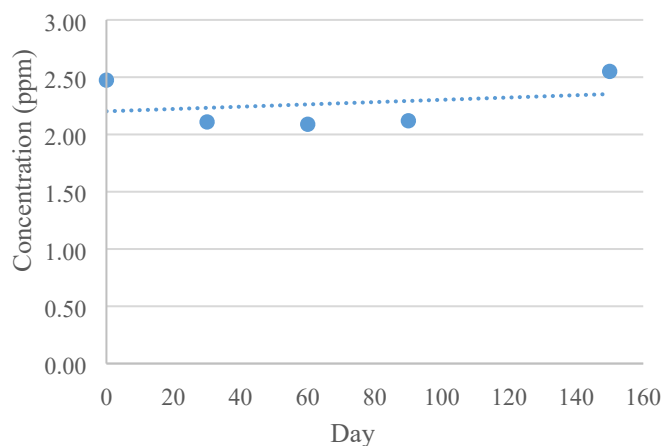

Stability of 4,4'-DDT in second bottle of mix A at -20°C for long-term

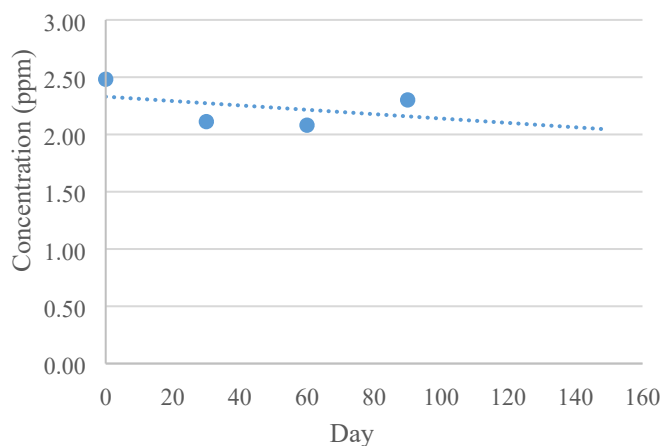

Stability of 4,4'-DDT in mix B at -20°C for long-term

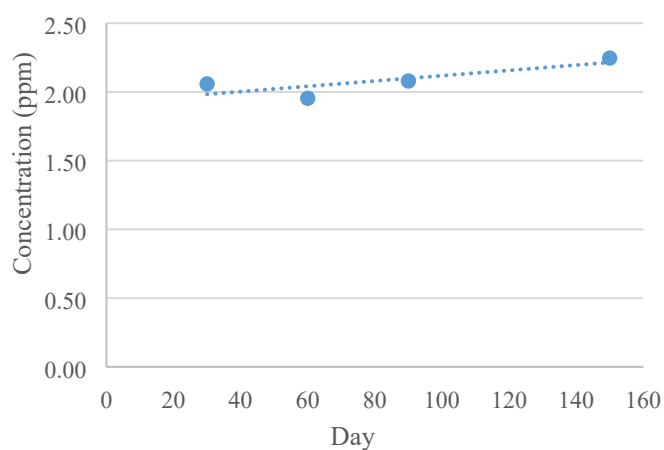

Stability of 2,4'-DDT in first bottle of mix A at -20°C for long-term

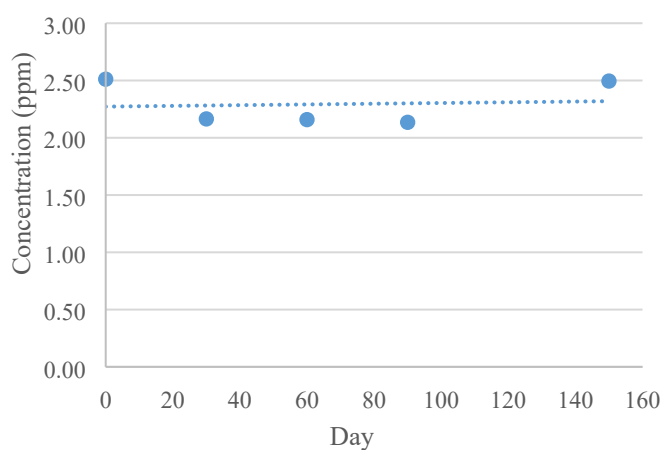

Stability of 2,4'-DDT in second bottle of mix A at -20°C for long-term

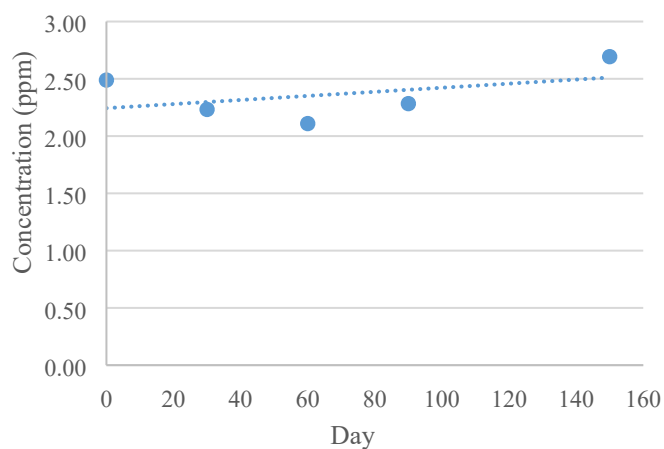

Stability of 2,4'-DDT in mix B at -20°C for long-term

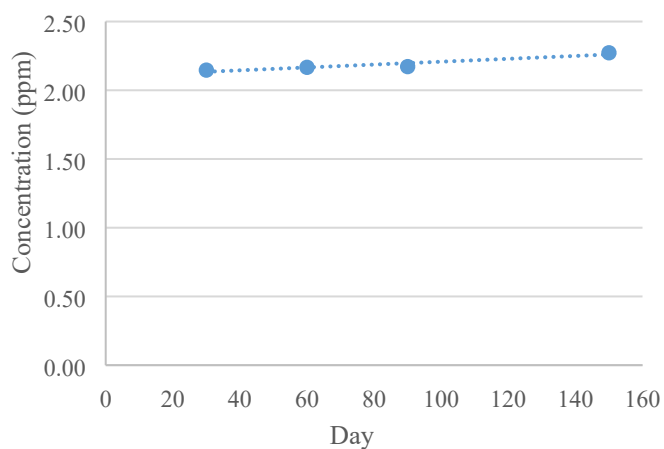

Stability of alpha-endosulfan in first bottle of mix A at -20°C for long-term

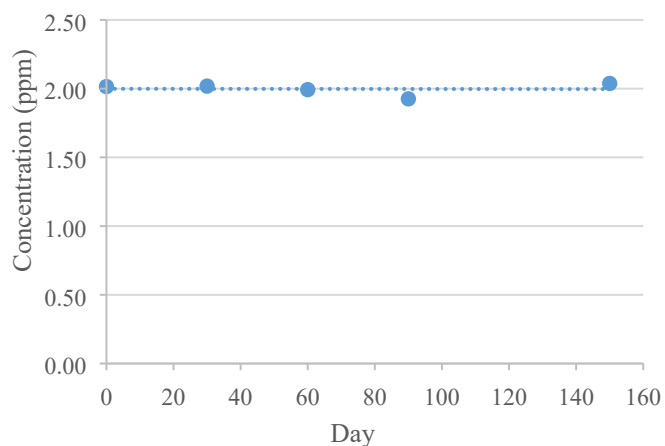

Stability of alpha-endosulfan in second bottle of mix A at -20°C for long-term

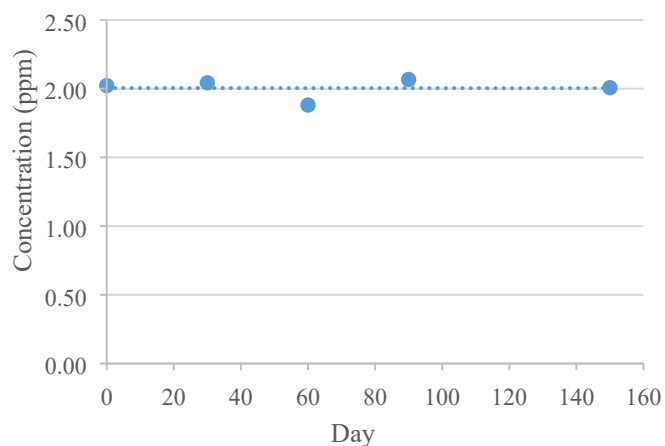

Stability of alpha-endosulfan in mix B at -20°C for long-term

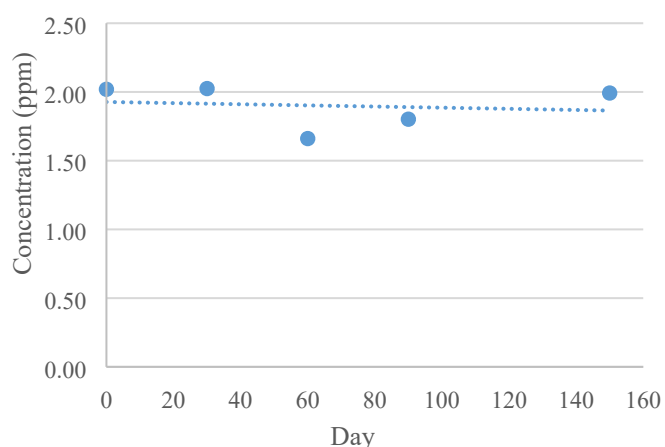

Stability of beta-endosulfan in first bottle of mix A at -20°C for long-term

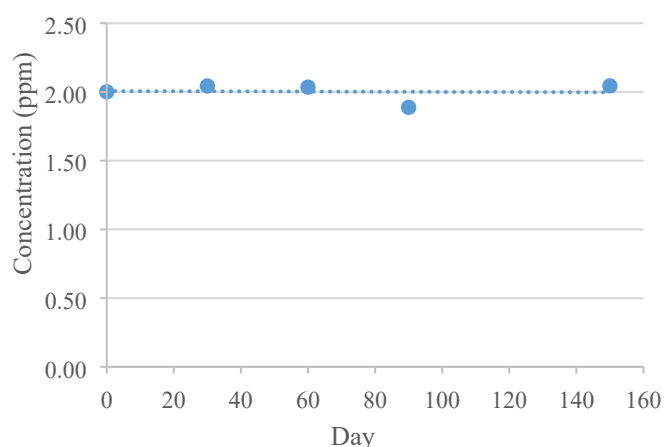

Stability of beta-endosulfan in second bottle of mix A at -20°C for long-term

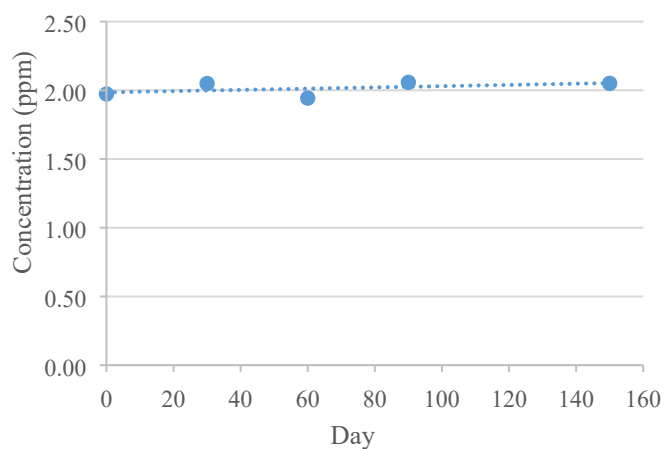

Stability of beta-endosulfan in mix B at -20°C for long-term

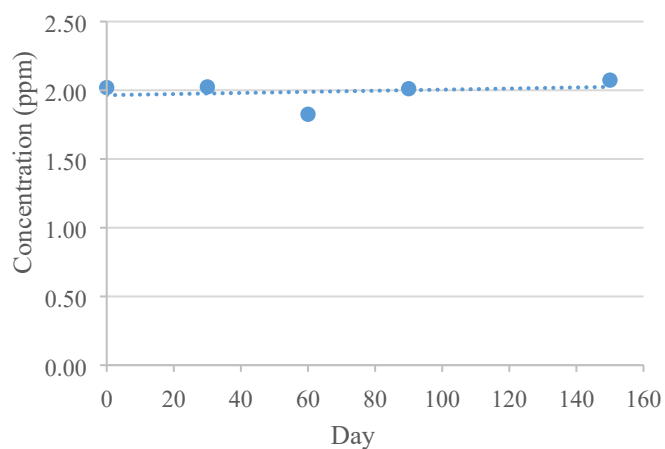

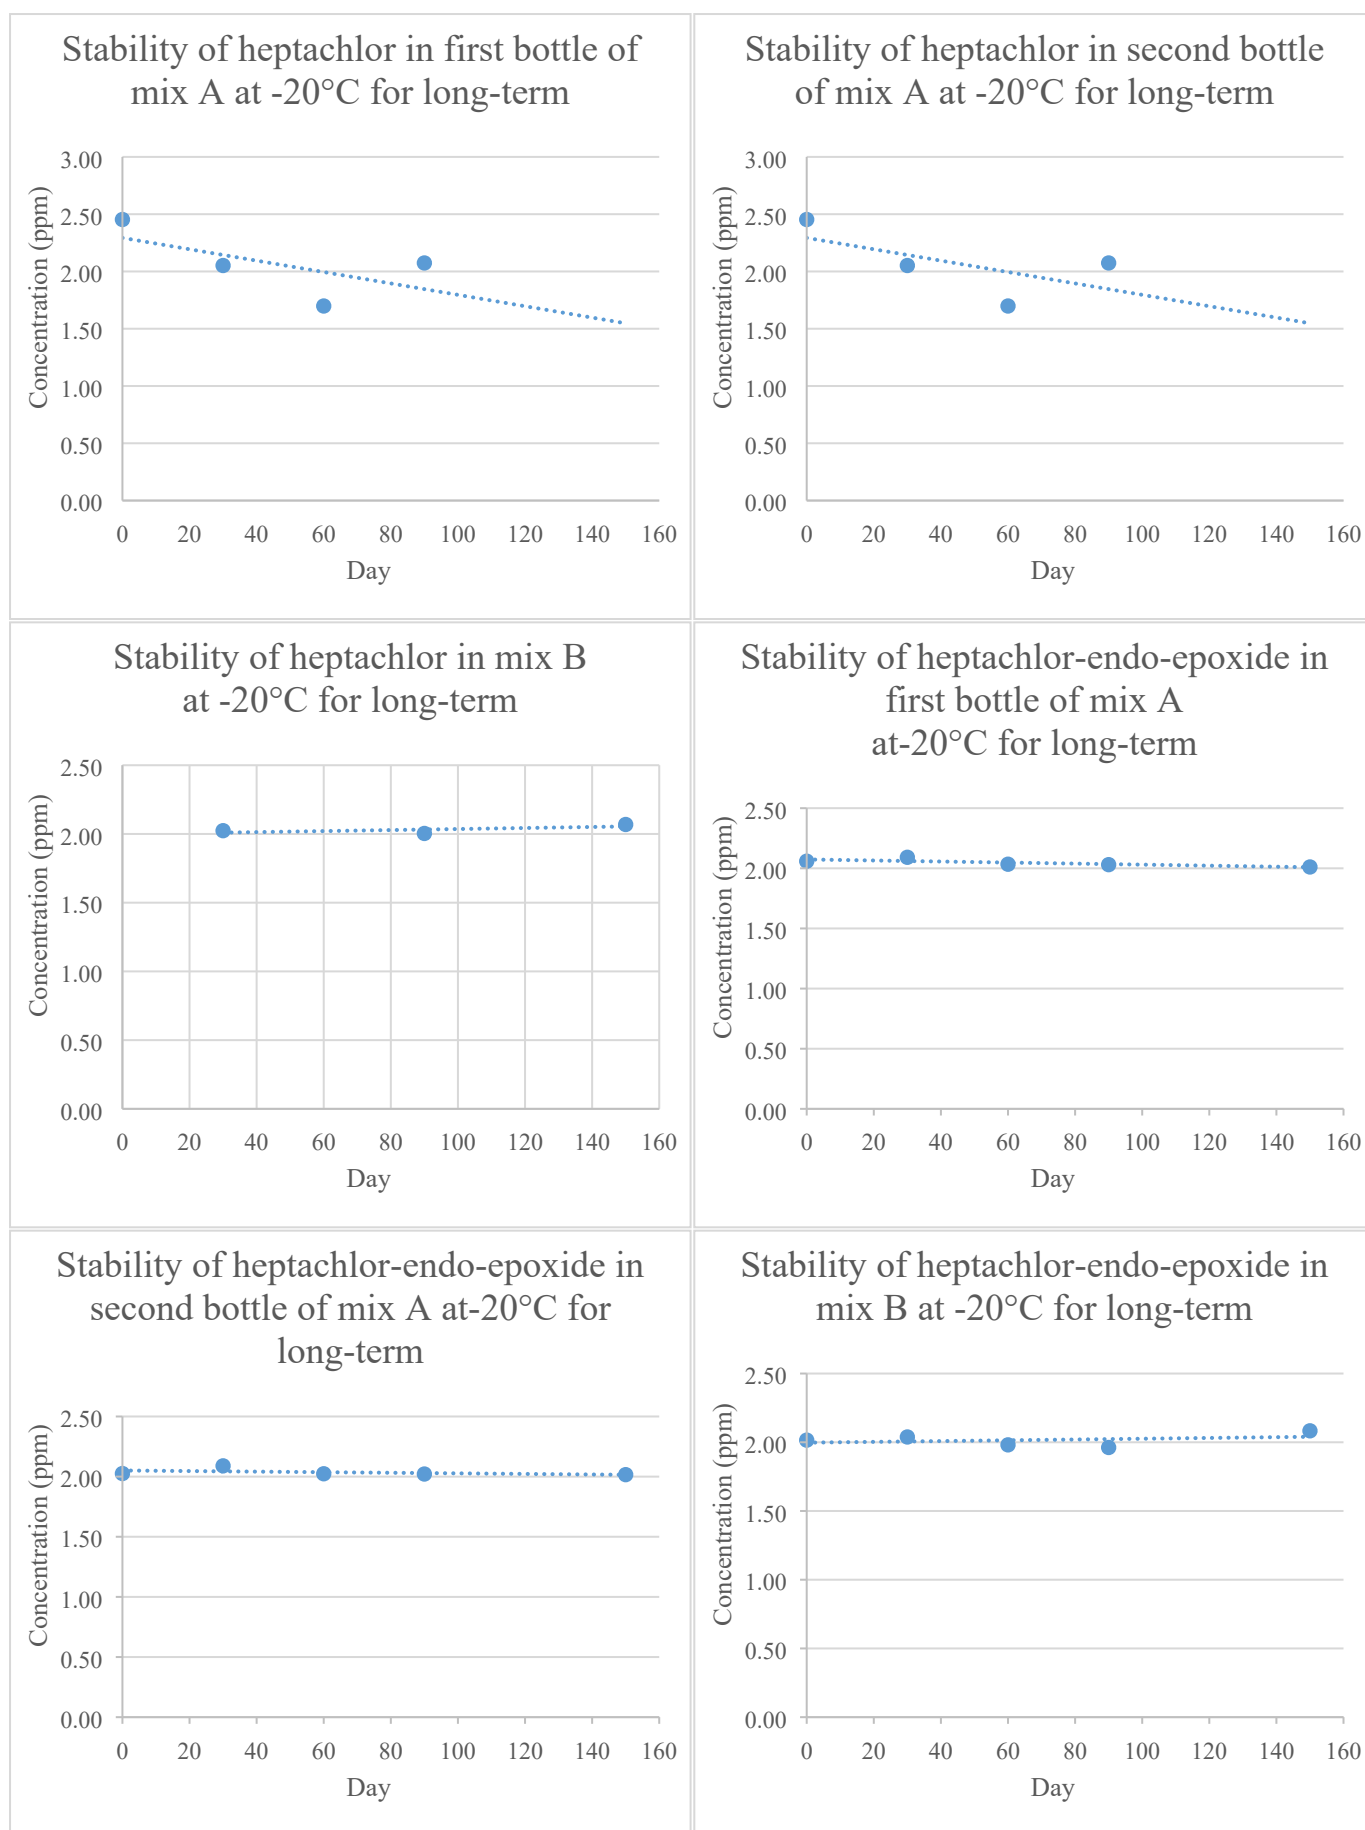

**Fig. S7** The plots of gravimetric mixtures (A and B) in long-term stability at -20°C for each pesticide
